1 **Title: Reinforcement targets sexual or postmating prezygotic reproductive**  
2 **barriers depending on species abundance and population history**

3

4 **Authors:** Noora Poikela<sup>1</sup>, Johanna Kinnunen<sup>1</sup>, Mareike Wurdack<sup>2</sup>, Hannele Kauranen<sup>1</sup>, Thomas  
5 Schmitt<sup>2</sup>, Maaria Kankare<sup>1</sup>, Rhonda R. Snook<sup>3</sup> and Anneli Hoikkala<sup>1</sup>

6

7 **Author affiliations:**

8 <sup>1</sup>Department of Biological and Environmental Science, University of Jyväskylä, Finland

9 <sup>2</sup>Department of Animal Ecology and Tropical Biology, University of Wuerzburg, Germany

10 <sup>3</sup>Department of Zoology, Stockholm University, Sweden

11

12 **Corresponding author:**

13 Noora Poikela, Department of Biological and Environmental Science, P.O. Box 35, FI-40014  
14 University of Jyväskylä, Finland

15 E-mail: noora.p.poikela@student.jyu.fi

16 Phone: +358 40 5383527

17

18 **Running title:** Reinforcement of prezygotic barriers

19

20 **Keywords:** speciation, sympatry, allopatry, female discrimination, courtship cue, *Drosophila*

21 *Abstract*

22 The impact of different reproductive barriers on species or population isolation may vary in different  
23 stages of speciation depending on evolutionary forces acting within species and through species'  
24 interactions. Genetic incompatibilities between interacting species are expected to reinforce  
25 prezygotic barriers in sympatric populations and create character displacement between conspecific  
26 populations living within and outside the area of sympatry. The outcome of reinforcement has been  
27 suggested to be affected by the strength of postzygotic barriers, the history of species coexistence,  
28 and the impact of species abundancies on females' discrimination against heterospecific males. We  
29 tested these predictions in *Drosophila montana* and *Drosophila flavomontana* populations from  
30 different geographic regimes. All barriers between *D. montana* females and *D. flavomontana* males  
31 were extremely strong, while in the reciprocal cross postzygotic isolation was less effective and the  
32 target of reinforcement varied according to population type. In long-established sympatric  
33 populations, where *D. flavomontana* is abundant, reinforcement targeted sexual isolation, and in  
34 populations, where this species is a new invader and rare, reinforcement targeted postmating  
35 prezygotic barriers. Reinforcement of these barriers also created respective barriers between different  
36 *D. flavomontana* populations. These findings show that interspecies interactions have far-reaching  
37 effects on strengthening species barriers and promoting speciation.

## 38 *Introduction*

39 Past and present climate change and human activity have induced shifts in species' distribution, which  
40 has had a strong impact on species interactions and speciation. When geographically or ecologically  
41 isolated populations or diverging species spread in the same area/habitat, their interaction may lead  
42 to different evolutionary outcomes depending on the strength of the reproductive barriers that they  
43 have evolved during isolation. If the barriers are weak to moderate, then the gene pools of the evolving  
44 species may be either merged (Servedio and Noor 2003; Arnold and Martin 2009) or the species may  
45 exchange gene alleles via hybridization and backcrossing (Abbott et al. 2013). If the barriers are  
46 strong enough, then the two species or isolated populations may live in sympatry. If the barriers are  
47 not complete, and maladaptive hybridization occurs, then selection for reinforcement of barriers that  
48 function at an earlier stage of interactions between heterospecific individuals is predicted  
49 (Dobzhansky 1940; Howard 1993; Servedio and Noor 2003; Turissini et al. 2018). This reinforcement  
50 of sexual or postmating prezygotic (PMPZ) barriers will lead to reproductive character displacement  
51 (i.e. greater divergence between species in areas of sympatry than in areas of allopatry) in traits like  
52 female mate discrimination and preferences, courtship cues and gamete recognition. As a  
53 consequence, speciation between populations of the same species may be promoted (Howard 1993;  
54 Ortiz-Barrientos et al. 2009; Hoskin and Higgie 2010). Thus, to understand how the evolution of  
55 different components of reproductive isolation during species divergence occurs, and its broader  
56 implications, elucidating which barriers are targeted by reinforcement and the role of reinforcement  
57 in completing or initiating speciation both between species and between populations of a species is  
58 critical (Butlin et al. 2008; Nosil et al. 2009; The Marie Curie speciation network 2012).

59 One group of organisms in which the evolution of reproductive barriers has been well-studied is  
60 *Drosophila*. Sexual isolation in this taxon has been shown to evolve faster than postzygotic isolation  
61 (Coyne and Orr 1997), and PMPZ isolation faster than hybrid inviability but more slowly than sexual  
62 isolation (Turissini et al. 2018). However, there is no general agreement on how strongly  
63 reinforcement contributes to the evolution of prezygotic barriers. Sexual isolation is usually  
64 maintained by females, based on species differences in male-female interactions, courtship cues and  
65 female discrimination for these cues (Chenoweth and Blows 2006). Female acceptance threshold may  
66 vary between the interacting species, and different sensory modalities and courtship cues used in  
67 courtship and mating may differ between closely-related species (Gleason et al. 2012; Giglio and  
68 Dyer 2013; Colyott et al. 2016). Reinforcement enhances female discrimination against  
69 heterospecific males in sympatric populations and increases their discrimination towards conspecific  
70 males, and thus sympatric females may reject allopatric males as mates. The converse (i.e., allopatric

71 females with sympatric males) need not be true (Noor 1999; Hoskin et al. 2005; Jaenike et al. 2006;  
72 Bewick and Dyer 2014). Most of the identified PMPZ barriers, including incompatibilities in the  
73 transfer, storage and use of heterospecific sperm, involve discordant interactions between gametes or  
74 between the female reproductive tract and male seminal fluids, and they can function after a single  
75 mating (Howard 1999; Wirtz 1999; Price et al. 2001; Howard et al. 2009). Even though postmating  
76 interactions can have important fitness consequences for both sexes, reinforcement of PMPZ barriers  
77 in insect species has been reported only between *D. yakuba* and *D. santomea* (Matute 2010) and  
78 between *D. pseudoobscura* and *D. persimilis* (Castillo and Moyle 2017).

79 Reinforcement is most likely when species hybridization is common and its costs are high, and when  
80 the opposing forces of gene flow and recombination are weak (e.g. Servedio and Noor 2003; Coyne  
81 and Orr 2004; Servedio 2009; Butlin and Smadja 2018). Accordingly, almost all sympatric  
82 *Drosophila* species have been found to have concordant pre- and post-zygotic isolation asymmetries,  
83 where the more costly reciprocal mating has greater prezygotic isolation relative to the less costly  
84 mating, while no such patterns exist in allopatry (Yukilevich 2012). The outcome of reinforcement  
85 can also be affected by changes in species' distribution and abundance, the length of species  
86 coexistence, and the effects of natural and sexual selection between and within species (Servedio  
87 2001; Servedio and Noor 2003; Smadja and Butlin 2011; Nosil 2012). Whether this strengthens or  
88 weakens female discrimination of heterospecific males is less clear. In the "rarer female hypothesis",  
89 species recognition ability of females of the less abundant species is expected to get reinforced,  
90 because these females encounter more heterotypic mating attempts in the wild and suffer from higher  
91 hybridization costs than those of the more abundant species (Noor 1995; Hoskin et al. 2005;  
92 Yukilevich 2012). However, several studies have shown that females' ability to distinguish hetero-  
93 from con-specifics weakens when population density is small and the likelihood of encountering  
94 conspecific males is low (see Wirtz 1999 for a review; Matute 2014). Reinforcement of sexual  
95 isolation in this scenario may not be possible, and thus natural and sexual selection could drive the  
96 evolution of PMPZ barriers to limit costs of maladaptive hybridization (Turissini et al. 2018).

97 Despite these predictions, few studies have examined whether the targets and consequences of  
98 reinforcement vary between species in different contexts – between species that have a longer history  
99 of sympatry compared to a scenario in which one species has only recently invaded and is still rare –  
100 and whether this variation impacts reproductive barriers between populations of the same species.  
101 We use the species pair, *D. montana* and *D. flavomontana*, which offers an excellent opportunity to  
102 address these outstanding speciation questions. The species diverged from each other from ~1 million  
103 (Poikela and Lohse et al., unpublished data) to 4.9 million years ago (Morales-hojas et al. 2011), and

104 chromosomal studies performed on these species suggest that both of them originated from the Rocky  
105 Mountains (Stone et al. 1960), where they still hybridize to some degree (Patterson 1952). *D. montana*  
106 has distributed around the northern hemisphere, including the western coast of North America  
107 (Throckmorton 1982), while *D. flavomontana* has spread from the Rocky Mountains to the western  
108 coast only after the extensive collections carried out on this area in 1950's (see Patterson 1952), and  
109 is still rare. Both species have a patchy population structure, as they live only on the waterside and as  
110 their distribution and abundance depend on climatic factors and the presence of species-specific host  
111 trees (*D. montana* aspen and alder and *D. flavomontana* cotton wood; Patterson 1952). Reproductive  
112 barriers between *D. montana* females and *D. flavomontana* males are nearly complete, while the  
113 barriers between *D. flavomontana* females and *D. montana* males are weaker (Patterson 1952), which  
114 provides an opportunity for reinforcement and its potential effects on reproductive isolation between  
115 conspecific populations.

116 Using this system, we have (1) studied the strength of postzygotic barriers between *D. montana* and  
117 *D. flavomontana* in allopatric populations and in sympatric populations with different histories and  
118 species abundances, (2) tested whether and how the strength of postzygotic barriers, the length of  
119 species coexistence and the species' relative abundances have affected the reinforcement of sexual  
120 and/or PMPZ barriers, and (3) traced the effects of reinforcement on the divergence of reproductive  
121 traits and the enhancement of reproductive barriers between *D. flavomontana* populations from  
122 allopatry and sympatry (Fig. 1). We predict that in sympatric Rocky Mountains populations, where  
123 *D. flavomontana* is abundant, reinforcement has increased the discrimination of *D. flavomontana*  
124 females against *D. montana* males, and induced changes in the key courtship cues of *D. flavomontana*  
125 males, which has generated sexual isolation between the females of these populations and conspecific  
126 males from other populations (Fig. 1). Reinforcement may have occurred similarly in sympatric  
127 western coast populations, where *D. flavomontana* is a new invader and still rare, if species  
128 recognition of females has not decreased due to the lack of conspecific mating partners. If, however,  
129 female *D. flavomontana* mate recognition is low, reinforcement should have targeted PMPZ barriers  
130 and induced reproductive character displacement in traits maintaining these barriers both between the  
131 species and between *D. flavomontana* populations (Fig. 1).

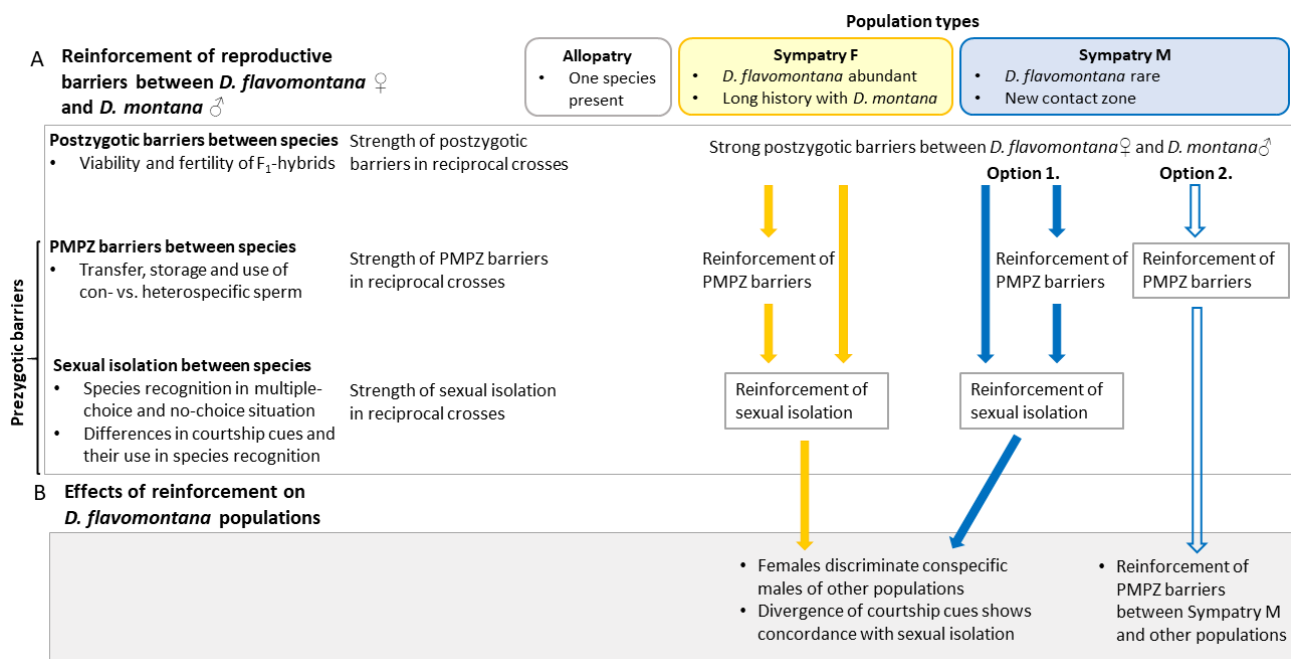

132

133 Figure 1. Predictions for the evolution of reproductive barriers. (A) The strength and asymmetry of  
 134 reproductive barriers between *D. montana* and *D. flavomontana* in three population types, and reinforcement  
 135 of prezygotic barriers in sympatric populations with different species abundances and different length of  
 136 species coexistence (Sympatry F and Sympatry M). (B) Effects of reinforcement on divergence of  
 137 reproductive traits among *D. flavomontana* populations.

## 138 *Material and Methods*

### 139 **STUDY SPECIES**

#### 140 *D. montana* and *D. flavomontana* populations

141 *D. montana* and *D. flavomontana* belong to the montana subphylad of the *D. virilis* group (Morales-  
 142 hojas et al. 2011). *D. montana* is distributed around the northern hemisphere and in North America it  
 143 is found in high latitudes in Canada and Alaska, in high altitudes (from 1400 to above 3000 m) and  
 144 wide range of latitudes in the Rocky Mountains, and in low altitudes and latitudes along the western  
 145 coast of the United States (US) and Canadian Pacific coast (Patterson 1952; Stone et al. 1960;  
 146 Throckmorton 1982). *D. flavomontana* lives in lower altitudes than *D. montana* (usually below 2000  
 147 m), and in the 1950s its distribution was restricted to the Rocky Mountains area (Patterson 1952;  
 148 Stone et al. 1960). Our collections in 2010 – 2015 showed that the distribution of both species had  
 149 shifted northwards and towards higher altitudes and that *D. flavomontana* had invaded the North  
 150 American western coast, where it had not been detected before.

151 The allopatric strains used in this study are either truly allopatric (*D. montana*, Seward, Alaska) or  
 152 from single-species sites on the Rocky Mountains area (*D. montana*: Afton, Wyoming; *D.*

153 *flavomontana*: Livingston, Montana and Liberty, Utah; Fig. 2). Two types of sympatric strains were  
 154 studied: collections representing the old distribution area of both species around the lower slopes of  
 155 the Rocky Mountains (altitude up to 2 000 meters), where *D. flavomontana* is more abundant than *D.*  
 156 *montana* (hereafter referred to as “Sympatry F”; Cranbrook, Canada and Jackson, Wyoming), and  
 157 those from the western coast of North America, where *D. flavomontana* has invaded recently and is  
 158 still rare (hereafter referred to as “Sympatry M”; Terrace, Canada; Vancouver, Canada; Ashford  
 159 Washington). In the following, we refer to the origin of the strains (Allopatry, Sympatry F and M) as  
 160 “population type”.

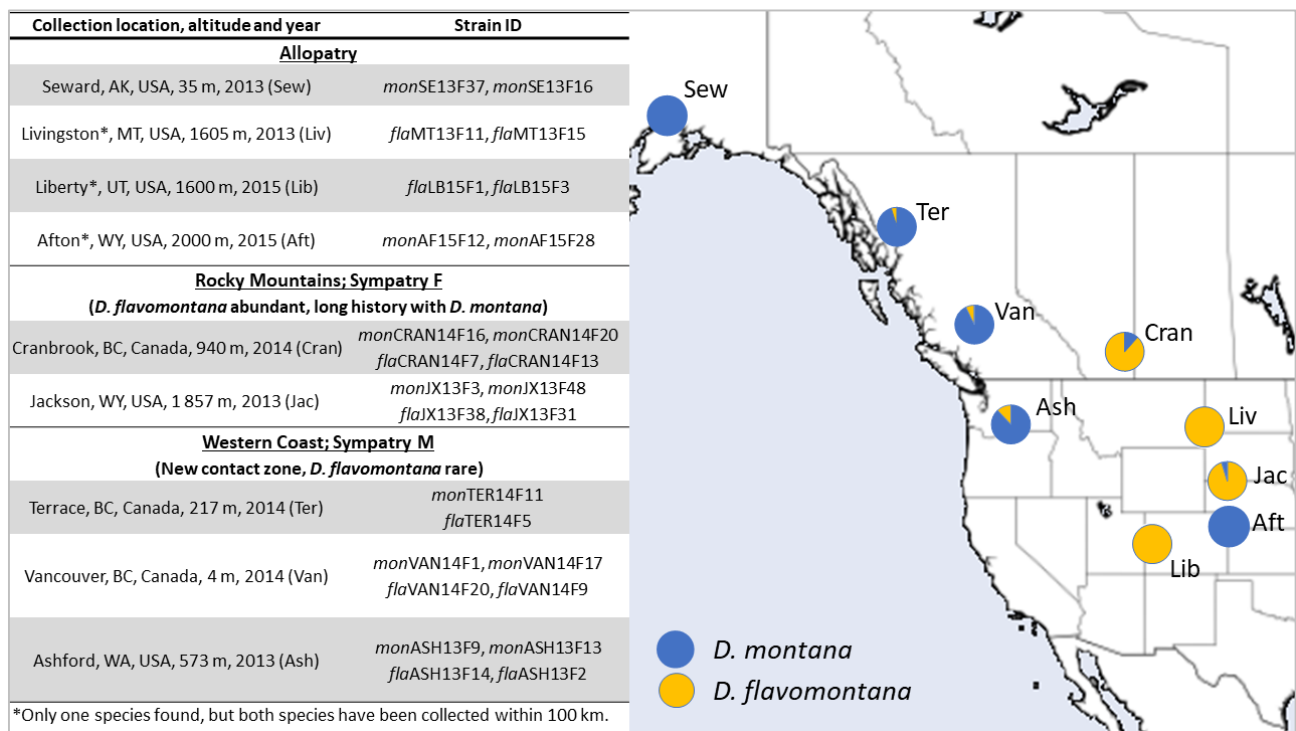

161  
 162 Figure 2. Collection sites and proportion of *D. montana* and *D. flavomontana* in North America. Sample sizes  
 163 varied between ~40 and 100 individuals per site, except in Liberty where only six flies were collected.  
 164 Patterson (1952) collected 203 *D. flavomontana* and only 1 *D. montana* from a large area located between  
 165 Liberty and the mountain slopes inhabited by both species (Morgan district), which confirms that the  
 166 population in Liberty can be regarded as an allopatric *D. flavomontana* population. Studies on reproductive  
 167 barriers involved 4 strain pairs from allopatric populations, 4 pairs from Sympatry F and 5 pairs from Sympatry  
 168 M (detailed information on strain pairs is given in Table S1).

### 169 *Isofemale line establishment, maintenance and experimental use*

170 Study strains consisted of the progenies of single overwintered, fertilized females collected in the  
 171 wild in 2013 – 2015 in North America (Fig. 2, Table S1). The species of the strains was identified by  
 172 sequencing part of the *COI* region in the mtDNA of one individual per progeny (see primer  
 173 information in Table S2) following the protocol in Simon et al. (1994). As reproductive isolation

174 between some *Drosophila* species has been found to be enhanced by Wolbachia infection (Clark et  
175 al. 2006), we tested for the presence of Wolbachia via PCR on two females and males per study strain  
176 (see detailed information in Table S2-S3) and by investigating the whole-genome sequences of four  
177 *D. montana* and five *D. flavomontana* strains. We found no evidence of Wolbachia genomic products  
178 in our samples. Therefore, any reproductive incompatibilities in our study are not explained by this  
179 endosymbiont and we do not discuss this further.

180 Strains were maintained and experiments performed in continuous light at  $19 \pm 1^\circ\text{C}$  and 60-70%  
181 humidity to prevent variation in flies' circadian rhythm and/or diapause susceptibility to affect the  
182 results. For all experiments and phenotypic assays, individuals were collected and sexed under light  
183 CO<sub>2</sub> anesthesia within three days after their emergence and maintained in plastic vials containing  
184 malt-yeast medium (15-20 virgin females or males per vial). Cuticular hydrocarbons (CHCs) were  
185 extracted at the age of 14 days when the females' ovaries can be expected to be fully developed  
186 (Salminen and Hoikkala 2013). Reproductive isolation experiments and phenotypic assays were  
187 conducted at the age of 18-22 days, when studies on *D. montana* mate choice are usually done (e.g.  
188 Jennings et al. 2014). All reproductive barriers were investigated using all strain pairs unless  
189 mentioned otherwise (Table S1).

## 190 **POSTZYGOTIC BARRIERS**

191 Postzygotic barriers between *D. montana* and *D. flavomontana* were studied by quantifying the  
192 viability, sex ratio and fertility of hybrid offspring from reciprocal interspecific crosses. F<sub>1</sub> hybrids  
193 were obtained by putting 10 females of one and 10 males of the other species into a malt vial (20  
194 replicates for each reciprocal cross) and transferring them into a fresh vial once a week for about one  
195 month. Viability of F<sub>1</sub> hybrids was determined by counting the number of 3<sup>rd</sup> instar larvae and females  
196 and males that were viable at least 24 hours after emergence (note that numbers of earlier stage larvae  
197 could not be counted reliably). In intraspecific controls, 5 conspecific females and males were put  
198 into a malt vial and transferred into a new vial every day for a week to prevent overcrowding (one  
199 replicate for two strain pairs per population type), and the same traits were measured.

200 Interspecific F<sub>1</sub> hybrids were collected from the vials within three days after eclosion. Their fertility  
201 was measured as the ability to produce progeny (at least one larva) when backcrossed to either *D.*  
202 *montana* or *D. flavomontana*. Each female (or male) hybrid was given a choice between males (or  
203 females) of both parental species. Hybrids that did not mate in the first trial were used in up to two  
204 more trials. Fertility of intraspecific F<sub>1</sub> hybrids was studied by performing single-pair matings  
205 between F<sub>1</sub> females and F<sub>1</sub> males from the same cross.



206 All statistical analyses were conducted in R (Version 3.4.3; R Core Team 2017) and R studio (Version  
207 1.1.383). We tested whether viability of intra- and inter- specific F<sub>1</sub> hybrids varied among crosses or  
208 among population types within a cross using generalized linear mixed model (GLMM), with viability  
209 as response variable and cross or population type as an explanatory variable. These analyses were  
210 done using *glmer* function of nlme package (Pinheiro et al. 2018) and specified a binomial distribution  
211 with logit link. Strains were treated as a random effect (nested within population type and cross). In  
212 one mon♀×fla♂ cross variation of a response variable was low (excess of zeroes), and a chi squared  
213 likelihood ratio test instead of a z-test was used to test the significance. We also used one-sample  
214 student's t tests using *t test* function of the stats package to test whether the proportion of female F<sub>1</sub>  
215 hybrids differed from the expected 0.50 among crosses and population types, and whether fertility of  
216 F<sub>1</sub> hybrid females and males deviated from the expected 1. Detailed statistics (degrees of freedoms,  
217 test statistics, P-values) and additional information on results are reported in Supporting Materials.

## 218 **PREMATING SEXUAL ISOLATION AND IMPORTANCE OF COURTSHIP CUES**

### 219 *Multiple-choice and no-choice tests*

220 The magnitude of sexual isolation between *D. montana* and *D. flavomontana* was quantified using  
221 both multiple- and no- choice tests between 9 am – 11 am for each trial. For multiple-choice tests, 30  
222 of each sex of both species were introduced into a 6cm<sup>3</sup> Plexiglas mating chamber without anesthesia  
223 (see Jennings et al. 2014). Mating pairs subsequently were removed by aspiration through holes in  
224 the mating chamber walls and identified by color (*D. montana* is darker than *D. flavomontana*). In  
225 Terrace population, where the color differences were smaller, different strains were marked by  
226 feeding individuals either red- or blue-colored food, altering the colors between trials (see Wu et al.  
227 1995). No-choice tests involved reciprocal trials of 30 females of one and 30 males of the other  
228 species. The protocol was the same as in the multiple-choice tests, except that individuals were  
229 observed for 2 hours. Controls for the no-choice tests were obtained by performing reciprocal crosses  
230 between two conspecific strains per population type (Table S1). Both multiple- and no- choice  
231 experiments were replicated five times (controls for no-choice tests one replicate), and mated females  
232 from no-choice tests were saved for PMPZ studies (see below). Sexual isolation was also studied  
233 between conspecific *D. flavomontana* strains comparing each population type using multiple-choice  
234 tests, and replicated three times, as described for heterospecific crosses (Table S1). In these  
235 experiments the flies of each strain were always marked with a different color, as explained above.

236 The strength of sexual isolation was calculated based on the first 50% of matings in multiple-choice  
237 tests, using the JMating 1.0.8 program (Rolan-Alvarez and Caballero 2000; Carvajal-Rodriguez and

238 Rolan-Alvarez 2006). Here the index of sexual isolation,  $I_{PSI}$ , is calculated from the total number of  
239 each type of mating pair, and the asymmetry index,  $I_{APSI}(ab/ba)$ , calculates potential differences in  
240 female preference for heterotypic males in reciprocal crosses.  $I_{PSI}$  ranges from -1 to 1, -1 denoting  
241 disassortative mating, 0 random mating and 1 complete sexual isolation, and  $I_{APSI}$  is calculated by  
242 dividing heterotypic  $I_{PSI}$ -values with each other. Significance of each index was determined by  
243 bootstrapping 10 000 times in JMating.

244 Interspecific no-choice tests were analyzed as a proportion of mated females using generalized linear  
245 mixed model (GLMM) with binomial distribution using crosses and population types within a cross  
246 as an explanatory variable as described in the section “Postzygotic isolation” above.

#### 247 *Species differences in the importance of potential sexual cues*

248 Contribution of visual, auditory (courtship song) and olfactory (cuticular hydrocarbons) cues in mate  
249 choice and species recognition of *D. montana* and *D. flavomontana* was determined by performing  
250 four sets of experiments with partially sensory deprived individuals within and between the species.  
251 Flies’ mating success was measured in the following treatments: (1) control - both females and males  
252 were unmanipulated and the experiment was done in light, (2) visual - both females and males were  
253 unmanipulated, but the experiments were run in darkness, (3) auditory – females were unmanipulated  
254 but males were muted by micro-scissoring off their wings, and (4) olfactory and auditory - the entire  
255 antennae of females, the third segment and arista of which receives olfactory and auditory cues  
256 (Carlson 1996; Tauber and Eberl 2003), were removed with tweezers.

257 Experiments were done for one strain pair of the two species from each population type, and different  
258 experiments involving the females of the same strain were run on the same day. In each treatment  
259 and experiment, 15 females and 15 males (either conspecific or heterospecific) were placed in a vial  
260 containing malt-yeast medium. After 24 hours the females were CO<sub>2</sub>-anesthetized with their  
261 reproductive tracts dissected on a microscope slide in a drop of PBS-solution, covered with a cover  
262 slip, and examined under light microscopy to determine the presence of sperm.

263 Differences between treatments in the proportion of mated females was analyzed with generalized  
264 linear mixed model (GLMM) with binomial distribution (other details described in the “Postzygotic  
265 isolation” section above).

#### 266 *Male courtship song analysis*

267 The songs of *D. montana* and *D. flavomontana*, produced by male wing vibration, differ clearly from  
268 each other (Päällysaho et al. 2003) and courtship songs are important in female mate choice and

269 species discrimination (Ritchie et al. 1998; Saarikettu et al. 2005). Variation within and between the  
270 species in these cues was investigated by analyzing the songs of five males of each study strain. For  
271 song recording, a sexually mature virgin female and male of the same strain were transferred into a  
272 small petri dish, which had a moistened filter paper on the bottom and a nylon net roof. Courting  
273 males walked upside down on the roof of the chamber, which allowed song recording by holding the  
274 microphone (JVC) directly above the male. Songs were recorded using a digital Handy Recorder H4n  
275 at a temperature of  $20 \pm 1^\circ\text{C}$  and analyzed with the Signal 4.0 sound analysis system (Engineering  
276 Design, Belmont, MA, USA). Song traits analyzed from oscillograms included the number of pulses  
277 in a pulse train (PN), the length of a pulse train (PTL), the length of a sound pulse (PL), the interpulse  
278 interval (IPI; the length of the time from the beginning of one pulse to the beginning of the next one)  
279 and the number of cycles in a sound pulse (CN; see Fig. A1). PN and PTL were analyzed for three  
280 whole pulse trains and PL, IPI and CN for the third or fourth pulse of each of these trains in  
281 oscillograms (see Fig. A1). In addition, song's carrier frequency (FRE) was measured from the  
282 frequency spectrum of the pulse trains.

283 Mean values of song traits were averaged over three pulse trains of each male. To reduce the number  
284 of variables in the dataset, a principal component analysis (PCA) was applied using the *prcomp*  
285 function in R (Version 3.4.3) and R studio (Version 1.1.383). Before running the PCA, pulse train  
286 length (PTL) was removed from the analysis due to its strong correlation with pulse number (PN)  
287 both in *D. montana* (84%) and *D. flavomontana* (85%). PCA scores for each study strain were  
288 centered and scaled. The differences in each courtship parameter within species between population  
289 types were analyzed with linear mixed model (LMM) using study strains as a random effect. These  
290 analyses were done using *lmer* function of nlme package (Pinheiro et al. 2018).

### 291 *Cuticular hydrocarbon (CHC) profiles*

292 CHCs may serve as contact pheromones and function in female discrimination of mates (Ferveur  
293 2005; Jennings et al. 2014a). CHC profiles were analyzed for both sexes of all study strains (usually  
294 5 individuals/sex/strain; Table S4). CHC extractions were performed in the morning by immersing  
295 individuals in 200  $\mu\text{l}$  of n-hexane in glass vials (Micro Liter Analytical Supplies; 1.8 ml) for 10 min,  
296 after which individuals were removed. Open vials were maintained in a sterile fume hood at room  
297 temperature until the hexane had evaporated, then vials were sealed and stored at  $-20^\circ\text{C}$ . Control vials  
298 with pure solvent (n-hexane) were prepared in the same way.

299 CHC extracts were analysed with an Agilent7890 gas chromatograph (GC) coupled with an Agilent  
300 5975C Mass Selective (MS) Detector (Agilent, Waldbronn, Germany) at the University of Wuerzburg

301 (Germany). The GC (split/splitless injector in splitless mode for 1 min, injected volume: 1  $\mu$ l at  
302 300°C) was equipped with a DB-5 Fused Silica capillary column (30m x 0.25 mm ID, df = 0.25  $\mu$ m;  
303 J&W Scientific, Folsom, USA). Helium served as a carrier gas at a constant flow of 1 ml/min. The  
304 temperature program consisted of the start temperature 60°C, temperature increase by 5°C/min up to  
305 300°C and maintenance at 300°C for 10 min. The electron ionization mass spectra (EI-MS) were  
306 acquired at an ionization voltage of 70 eV (source temperature: 230°C). Chromatograms and mass  
307 spectra were recorded and quantified with the software Agilent Enhanced Chem Station G1701AA  
308 (version A.03.00). Individual CHC compounds were chemically identified using the MS data base  
309 Wiley275 (John Wiley & Sons, New York, USA), retention indices, and the detected diagnostic ions  
310 (Bernier et al. 1998). Some substances could not be accurately separated and, in these cases, the  
311 combined quantity was calculated by integrating over all substances within a peak.

312 CHC profile similarity was assessed by means of multivariate Linear Discriminant Analysis (LDA)  
313 and Random forest classification using the functions *lda* of MASS package and *randomForest* of  
314 randomForest package (Liaw and Wiener 2002). In addition, Bray-Curtis dissimilarities were  
315 analyzed for differences between species in each population type and differences between sexes  
316 within a population type for both species. Values range from 0 to 1, where 0 means the same  
317 composition and 1 means complete dissimilarity. Significance levels were tested with linear mixed  
318 model (LMM) using study strains as a random effect.

### 319 **POSTMATING-PREZYGOTIC (PMPZ) BARRIERS**

320 Females that copulated for at least 3 minutes (to ensure sperm transfer: Mazzi et al. 2009) with a  
321 heterospecific male were obtained from the no-choice tests (described above, section “Multiple-  
322 choice and no-choice tests”). As the number of matings between *D. montana* females and *D.*  
323 *flavomontana* males was low, we generated more matings in this direction by playing females  
324 conspecific song (see e.g. Saarikettu et al. 2005) while being exposed to *D. flavomontana* males that  
325 were muted (described above, section “Species differences in the importance of potential sexual  
326 cues”) 1d before the mating experiment. *D. montana* females and muted *D. flavomontana* males  
327 (n=10-15 per trial) were placed in a mating arena (small petri dish and a nylon net roof) placed above  
328 a subwoofer (Harman Kardon JBL Platinum Series Speakers) connected to a computer. Recorded *D.*  
329 *montana* song was played throughout the courtship, and mating pairs were collected once copulation  
330 had ended. 10 reciprocal single-pair crosses were made between the females and males of two  
331 conspecific strains from each location for intraspecific controls.

332 PMPZ barriers were quantified by assessing sperm transfer and storage, and the production and  
333 fertilization of eggs in all interspecific crosses and their controls. Mated females were placed  
334 individually into a set of 20 vials (“manifold”) with 1 cm of malt-yeast medium at the bottom and  
335 dissected after 48 hours to check for the presence of sperm in their seminal receptacles and  
336 spermathecae. The amount of sperm was estimated using four categories: 0 = no motile sperm, 1 =  
337 maximum of two sperm cells, 2 = intermediate amount of sperm and 3 = seminal receptacles and/or  
338 spermatheca full of sperm. The number of eggs laid by each female in the vial was counted  
339 immediately after her removal, and again after three days, to calculate the proportion of eggs that had  
340 hatched and proceeded to larval stage during this period. Finally, as also virgin females lay eggs, we  
341 asked whether and how much the receipt of sperm increases females’ fecundity.

342 Reduction in the proportion of hatched eggs may result from either fertilization failure (PMPZ  
343 barriers) or from problems in embryo development due to genetic incompatibilities (postzygotic  
344 barriers). To distinguish between these, egg fertilization and embryo development were investigated  
345 in eggs laid by *D. flavomontana* females that had mated to *D. montana* males (reciprocal cross was  
346 not studied because *D. montana* females did not store *D. flavomontana* sperm), and between *D.*  
347 *flavomontana* populations, using all strain pairs. Freshly laid eggs of 17-33 mated females per strain  
348 were collected each day for 3d, then fixed and processed for fluorescence microscopy (DAPI, Snook  
349 and Karr 1998; Jennings et al. 2014b). Eggs were classified as developing if either clear mitotic  
350 division or cellular differentiation was evident. Eggs that did not meet these criteria (Fig. A2) were  
351 examined for the presence of sperm inside the egg to determine whether these were fertilized but  
352 karyogamy had not yet occurred or whether they were unfertilized (i.e. sperm were absent). The  
353 presence of sperm inside eggs was scored using differential interference contrast (DIC) light  
354 microscopy (Jennings et al. 2014b). Sperm length of *D. montana* is  $3.34 \pm 0.02$  mm and of *D.*  
355 *flavomontana* is  $5.53 \pm 0.01$  mm (Pitnick et al. 1999), thus the sperm flagellum can easily be seen as  
356 a coiled structure near the anterior end of the egg (see Fig. A2).

357 Variation in females’ sperm storage ability among intra- and inter- specific crosses and between  
358 population types within a cross was tested treating this trait as an ordinal variable in cumulative link  
359 mixed model (CLMM). These analyses were conducted using *clmm* function of ordinal package  
360 (Christensen 2018). Proportion of hatched/developing eggs were analyzed as in the “Postzygotic  
361 isolation” section, using generalized linear mixed model (GLMM) with binomial distribution. In  
362 some  $\text{mon}^{\text{♀}} \times \text{fla}^{\text{♂}}$  crosses, variation of a response variable was low (excess of zeroes), and a chi  
363 squared likelihood ratio test instead of a z-test was used to test the significance. Finally, we tested  
364 whether the presence of sperm had increased number of eggs laid (fecundity) in each cross using

365 generalized linear mixed model (GLMM) with negative binomial distribution, with fecundity as a  
366 response variable, presence of sperm (yes/no) as an explanatory variable and study strains as random  
367 effects. These analyses were carried out using *glmmadmb* function of glmmADMB package (Skaug  
368 et al. 2013).

## 369 *Results*

### 370 **POSTZYGOTIC BARRIERS – FITNESS OF F<sub>1</sub> HYBRIDS**

371 We first determined the strength of postzygotic isolation to define the cost of interspecific matings,  
372 which generates selection for reinforcement, by producing intra- and inter- specific F<sub>1</sub> hybrids and  
373 measured their viability (from the 3<sup>rd</sup> instar larvae to adult), sex ratio, and fertility. We found that  
374 crosses between *D. flavomontana* females and *D. montana* males produced a higher number of 3<sup>rd</sup>  
375 instar larvae than the reciprocal cross, especially in Allopatry (339 and 31 larvae, respectively; Fig.  
376 3A-B), which could be due to that the flies had not mated or that the females had problems in sperm  
377 usage. Viability of F<sub>1</sub> hybrids from crosses between *D. montana* females and *D. flavomontana* males  
378 was very low compared to that of the intraspecific crosses, except in Sympatry F (Fig. 3C). Due to  
379 small sample sizes, sex-ratio bias could not be tested statistically in these interspecific crosses.  
380 Viability of F<sub>1</sub> hybrids from crosses between Allopatric *D. flavomontana* females and *D. montana*  
381 males did not differ from viability of intraspecific progeny, while in Sympatry F or Sympatry M F<sub>1</sub>  
382 hybrid viability was significantly lower than in intraspecific crosses (Fig. 3D, Table S5). The opposite  
383 pattern was seen for sex-ratio bias: compared to intraspecific crosses, F<sub>1</sub> hybrids between Allopatric  
384 *D. flavomontana* females and *D. montana* males were significantly female-biased whereas there was  
385 no significant difference in sex ratio of F<sub>1</sub> hybrids arising from either Sympatry F or Sympatry M  
386 (Fig. 3B, Table S5).

387 To determine F<sub>1</sub> hybrid fertility, hybrids were backcrossed to either of the parental species. There  
388 was no effect of parental species on F<sub>1</sub> hybrid fertility (GLMM,  $z_{1,99} = 1.21$ ,  $P = 0.228$ ) so subsequent  
389 statistics were performed on combined data of these crosses. Among the few hybrids produced in  
390 crosses between *D. montana* females and *D. flavomontana* males, only three females mated and two  
391 of them were fertile (Fig. 3E). Crosses between *D. flavomontana* females and *D. montana* males  
392 produced 106 F<sub>1</sub> hybrids and, while 101 mated to parental species (Table 1), all F<sub>1</sub> males were sterile  
393 and at least half the F<sub>1</sub> females fertile (Fig. 3F).

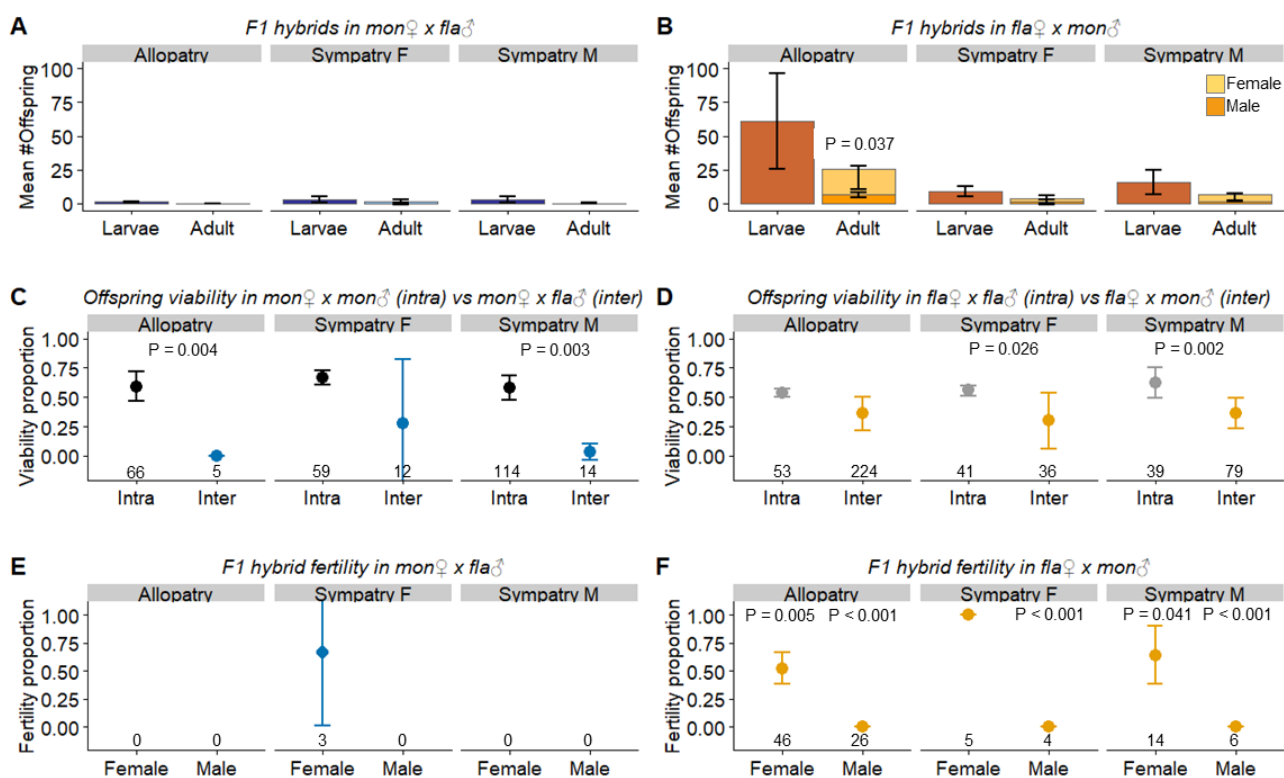

394

395

396

397

398

399

400

401

402

403

404

405

Figure 3. Offspring production and viability in intra- and inter- specific crosses and fertility of F<sub>1</sub> hybrids in different population types. Error bars represent 95% confidence intervals. (A) F<sub>1</sub> hybrid larvae and adults produced by *D. montana* females and *D. flavomontana* males. (B) F<sub>1</sub> hybrid larvae and adults (females and males) produced by *D. flavomontana* females and *D. montana* males. (C) Viability of F<sub>1</sub> hybrids produced in intra- and inter- specific crosses involving *D. montana* females. (D) Viability of F<sub>1</sub> hybrids in intra- and inter-specific crosses involving *D. flavomontana* females. Differences between intra- and inter- specific crosses were significant in both sympatric populations. (E) Fertility of F<sub>1</sub> hybrids produced in interspecific crosses involving *D. montana* females (could not be statistically tested due to small sample size). (F) Fertility of F<sub>1</sub> hybrids produced in interspecific crosses involving *D. flavomontana* females (could not be statistically tested for Sympatry F females since all of them were fertile). The numbers above x-axis refer to the total number of studied larvae (C and D) or adult flies (E and F).

406

## SEXUAL ISOLATION AND THE FACTORS MAINTAINING IT

407

*The strength and asymmetry of sexual isolation between the species and between D. flavomontana populations*

408

409

The strength of sexual isolation between *D. montana* and *D. flavomontana* was studied using multiple-choice and no-choice tests, and between *D. flavomontana* populations with multiple-choice tests. In interspecific multiple-choice tests, matings occurred mainly within the species and the sexual isolation index ( $I_{PSI}$ ) varied from 0.89 to 0.92 (Fig. 4A, Table S6). The asymmetry index ( $I_{APSI}$ ) showed that *D. flavomontana* females and *D. montana* males mated more than the flies of the

413

414 reciprocal cross when individuals were from either Allopatry or Sympatry M, but not Sympatry F  
 415 (Fig. 4B, Table S6; see data for individual strain pairs in Table S7).

416 No-choice tests measured the strength of sexual isolation when individuals were offered only  
 417 heterospecific mating partners. In all population types, the proportion of mated *D. flavomontana*  
 418 females was higher than that of *D. montana* females (Fig. 4C, Table S6), indicating that *D.*  
 419 *flavomontana* females are less discriminating than *D. montana* females against heterospecific males.  
 420 The proportion of mated *D. montana* females was equally low in all population types (Table S6),  
 421 while *D. flavomontana* females from Allopatry and Sympatry M mated more frequently with  
 422 heterospecific males than the ones from Sympatry F (Fig. 4C, Table S6). However, the proportion of  
 423 mated females remained very low in both interspecific crosses (0.00-0.01 between *D. montana*  
 424 females and *D. flavomontana* males and 0.03-0.11 between *D. flavomontana* females and *D. montana*  
 425 males; see Fig. 4C) compared to intraspecific crosses (*D. montana*: 0.90-0.97; *D. flavomontana*: 0.82-  
 426 0.92).

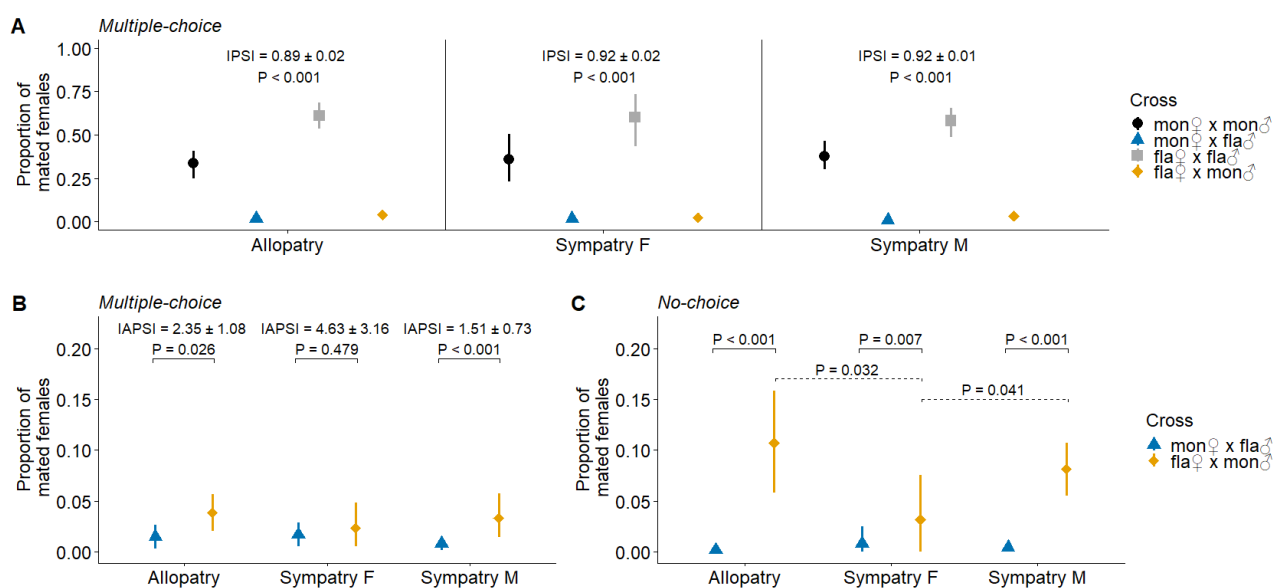

427  
 428 Figure 4. The strength of sexual isolation between *D. montana* and *D. flavomontana* in multiple- and no-choice  
 429 tests for different population types. (A) Sexual isolation index ( $I_{PSI}$ ) was significant, and biased towards  
 430 intraspecific matings, in all population types. (B) Multiple-choice asymmetry index ( $I_{APSI}$ ) tests showed that  
 431 population type impacted asymmetry: *D. flavomontana* females and *D. montana* males mated more often than  
 432 the reciprocal when individuals arose in Allopatry and Sympatry M, but not in Sympatry F. (C) No-choice  
 433 tests showed that *D. flavomontana* females and *D. montana* males mated more than the flies of the reciprocal  
 434 in all population types (solid line P values). Also, *D. flavomontana* females were more likely to mate with  
 435 heterospecific males in Allopatry and Sympatry M than in Sympatry F (dashed line P values). Error bars  
 436 represent bootstrapped 95% confidence intervals.



437 The strength of sexual isolation between *D. flavomontana* populations, measured in multiple-choice  
 438 tests, revealed significant isolation between individuals from the Sympatry M population type crossed  
 439 with individuals from the Sympatry F population type (Fig. 5; see data for individual strain pairs in  
 440 Table S8). This isolation was asymmetrical, with females from Sympatry F mating less often with  
 441 males from Sympatry M than vice versa. Other comparisons showed no sexual isolation.

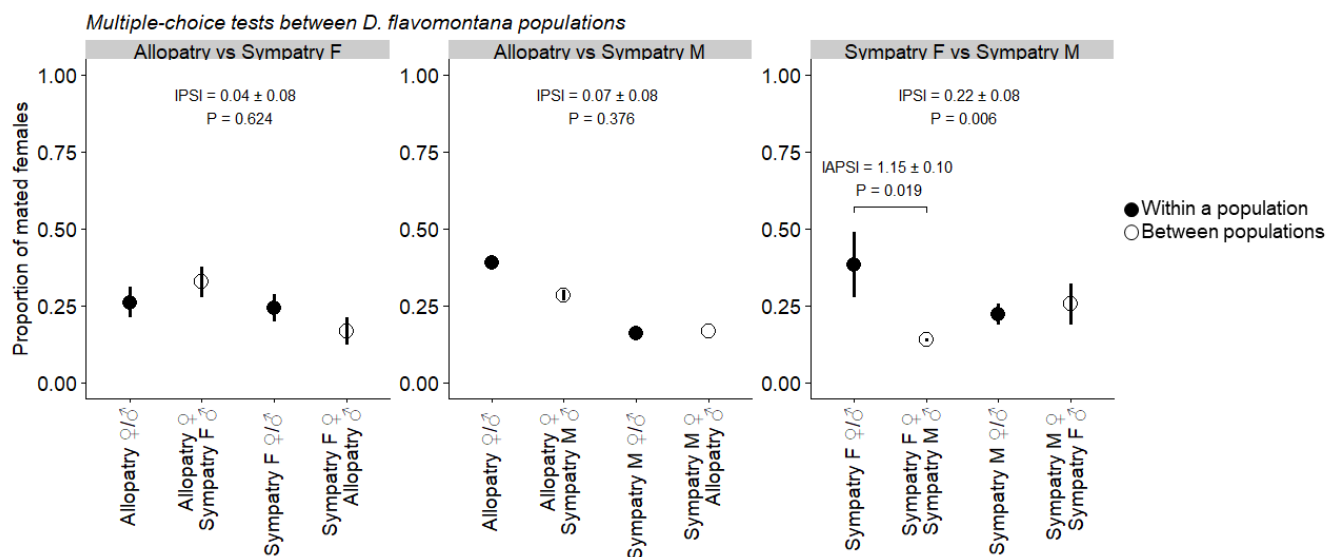

442  
 443 Figure 5. The strength of sexual isolation between different *D. flavomontana* populations (multiple-choice  
 444 test). Females from Sympatry F showed significant discrimination against males from Sympatry M, but the  
 445 other comparisons showed no sexual isolation. Error bars represent bootstrapped 95% confidence intervals.

#### 446 Importance of sexual cues in species recognition / sexual selection

447 The importance of visual, auditory and olfactory cues in species-recognition and/or sexual selection  
 448 was studied by comparing flies' mating propensity between the control trial and the test trials where  
 449 the transmission of one or more cues was prevented. Visual signals did not play an essential role in  
 450 mating success in either species, as mating frequency was at the same level in light (control) and in  
 451 dark (Fig. 5A and C, Table S9). However, the two species differed in the impact of auditory and  
 452 olfactory signals on mating success. *D. montana* females did not mate without hearing species-  
 453 specific male courtship song (Fig. 6A, Table S9) whereas *D. flavomontana* females mated equally  
 454 often with control and wingless (muted) males of their own species (Fig. 6C, Table S9). Removal of  
 455 female antennae, which silenced both auditory and volatile olfactory cues, prevented mating in *D.*  
 456 *montana*, as expected given the results of auditory manipulation alone (Fig. 6A, Table S9), and  
 457 significantly reduced male *D. flavomontana* mating success (Fig. 6C, Table S9).

458 Nearly all interspecific matings occurred between *D. flavomontana* females and *D. montana* males in  
 459 trials where male wings or female antennae had been removed (Fig. 6D, Table S9). *D. flavomontana*

460 females mated significantly more with wingless than with normal *D. montana* males (Fig. 6D, Table  
 461 S9), i.e. hearing a heterospecific song decreased their willingness to mate more than silence. Overall,  
 462 these results suggest that *D. montana* require male song (and perhaps CHCs) whereas the courtship  
 463 of *D. flavomontana* relies more on CHCs.

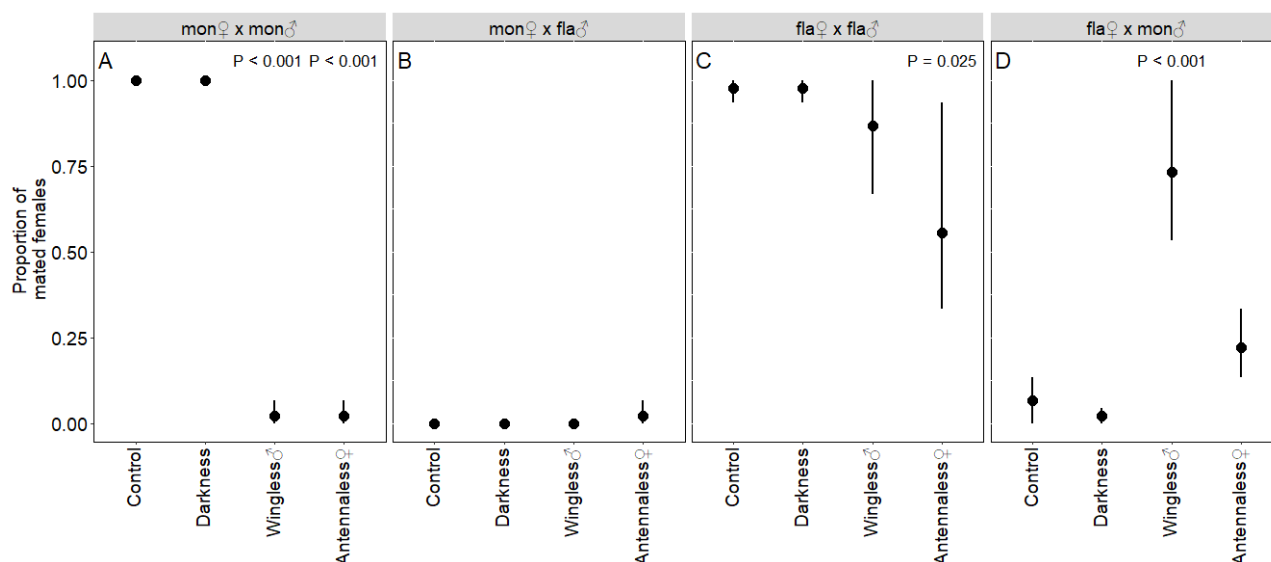

464  
 465 Figure 6. The impact of blocking the transfer of sensory cues on the proportion of mated females in intra- and  
 466 inter- specific crosses. (A) *D. montana* females did not mate with conspecific males when the wings of the  
 467 males or the antennae of the females had been removed. (B) *D. montana* females did not mate with *D.*  
 468 *flavomontana* males, except once when female antennae were removed. (C) *D. flavomontana* females mated  
 469 significantly less with conspecific males when female antennae were removed. (D) *D. flavomontana* females  
 470 mated significantly more with wingless (muted) *D. montana* males than with unmanipulated (control) males.  
 471 Error bars represent bootstrapped 95% confidence intervals.

#### 472 *Divergence in important sexual cues within and between species*

473 Divergence of important sexual cues, including male courtship song and CHCs, was studied between  
 474 conspecific populations and between species. Variation in male song traits within and between  
 475 species is illustrated with a principal component analysis plot (Fig. 7B). The first two components  
 476 accounted for 84.5% of the total between-male variance (Fig. S1, Table S10). The first principal  
 477 component separated pulse number (PN), pulse length (PL) and number of cycles per pulse (CN)  
 478 from interpulse interval (IPI) and explained 61.0% of the variation (Fig. 7B). The second principal  
 479 component explained 23.5% of variation, and here the number of cycles per pulse (CN) varied both  
 480 within and between species, while the song frequency (FRE) varied only within *D. montana*. In *D.*  
 481 *montana* CN and FRE were slightly higher in males from Allopatry than in males from Sympatry M

482 (LMM, CN:  $t_{1,43} = -3.04$ ,  $P = 0.019$ ; FRE:  $t_{1,43} = -2.45$ ,  $P = 0.040$ ), while none of the *D. flavomontana*  
483 song parameters varied significantly between population types (Table S11-12).

484 CHCs of allopatric *D. montana* and *D. flavomontana* populations resembled each other more than  
485 those from either of the sympatric population types (Fig. 7C). Species differences, calculated as Bray-  
486 Curtis dissimilarities, were significantly higher in Sympatry F ( $0.52 \pm 0.11$ ) and in Sympatry M ( $0.51$   
487  $\pm 13$ ) than in Allopatry ( $0.36 \pm 0.10$ ; LMM,  $t_{1,2670} = 6.60$ ,  $P < 0.001$  and  $t_{1,3783} = 5.81$ ,  $P < 0.001$ ,  
488 respectively), while Sympatry F and Sympatry M did not differ significantly from each other (LMM,  
489  $t_{1,3491} = -0.39$ ,  $P = 0.697$ ).

490 Within *D. montana*, CHC differences between sexes were higher in Sympatry M ( $0.39 \pm 0.14$ ) than  
491 in Allopatry ( $0.30 \pm 0.12$ , LMM,  $t_{1,910} = 2.52$ ,  $P = 0.016$ ), but equally high with Sympatry F ( $0.31 \pm$   
492  $0.13$ , LMM,  $t_{1,850} = 1.05$ ,  $P = 0.299$ ). They did not differ between Allopatry and Sympatry F either  
493 (LMM,  $t_{1,658} = 1.09$ ,  $P = 0.284$ ). Within *D. flavomontana*, CHC differences between sexes were more  
494 pronounced in Sympatry M ( $0.51 \pm 0.13$ ) than in Allopatry ( $0.37 \pm 0.10$ ; LMM,  $t_{1,978} = 4.13$ ,  $P <$   
495  $0.001$ ) or in Sympatry F ( $0.41 \pm 0.10$ ; LMM,  $t_{1,887} = 2.30$ ,  $P = 0.027$ ), where they were of the same  
496 level (LMM,  $t_{1,667} = 1.63$ ,  $P = 0.113$ ). Overall sex differences were higher in *D. flavomontana* than in  
497 *D. montana* (LMM,  $t_{1,2479} = -4.55$ ,  $P < 0.001$ ), further indicating that CHCs are more important in the  
498 sexual selection and/or species-recognition of *D. flavomontana* than that of *D. montana*. Confusion  
499 matrix for Random forest analysis showed only a few classification errors beyond the population type  
500 (Table S13). The sexes were confused slightly more often in *D. montana* than in *D. flavomontana*, in  
501 congruency with the higher chemical differentiation of the sexes in the latter species.

502

503

### A Male courtship song

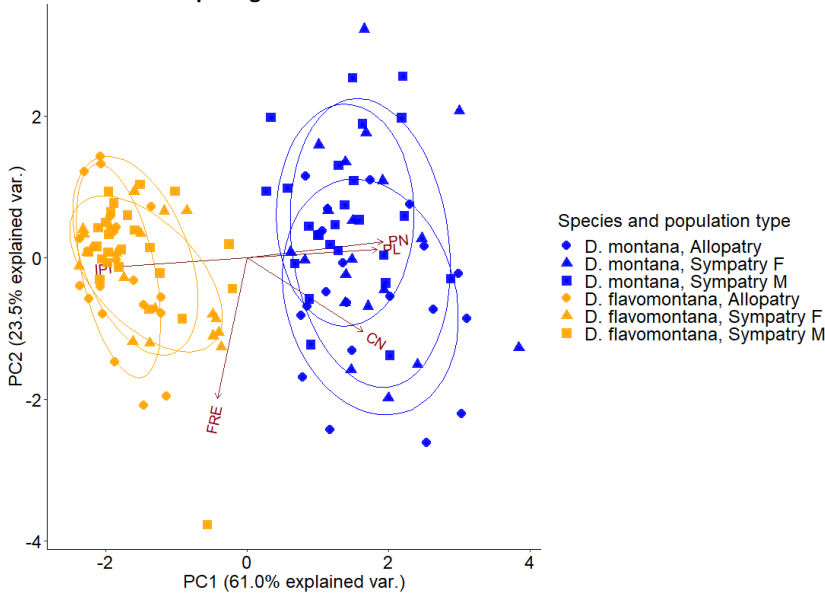

504

### B Cuticular hydrocarbons (CHCs)

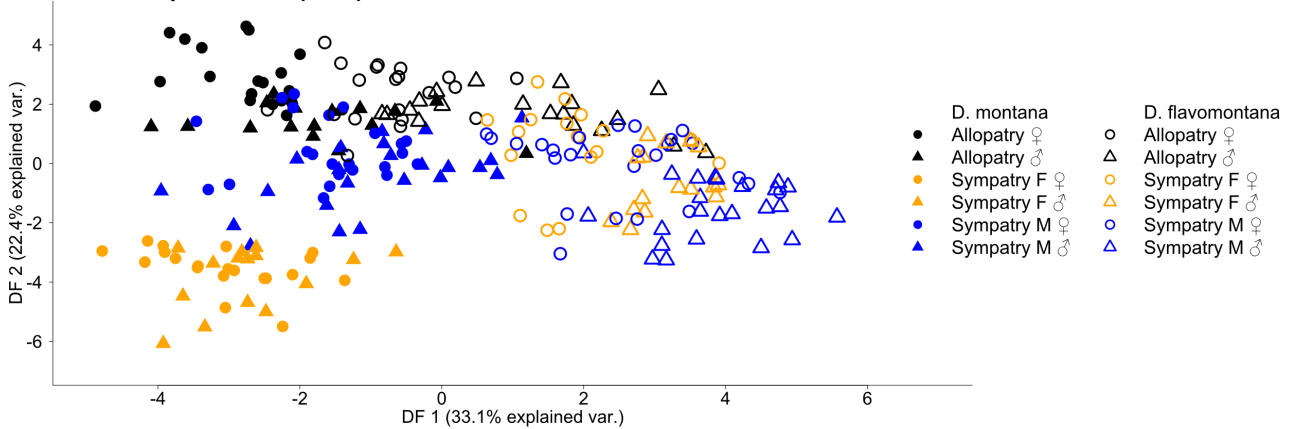

505

506 Figure 7. Variation between species and population types in male song and the CHCs of both sexes. (A) Male  
 507 courtship songs showed clear divergence between the species, while differences within the species were  
 508 relatively small. (B) CHCs varied both within and between the species with species differences being greatest  
 509 in sympatric populations. In addition, sex differences were higher within *D. flavomontana* than within *D.*  
 510 *montana*.

511 The most influential CHC substances for the chemical dissimilarities between species and between  
 512 sexes within species in each population type were defined using random forest analysis (Table 1, Fig.  
 513 S2). Most of the substances were alkenes with varying numbers of carbons in a chain and with  
 514 different double-pond position. Interestingly, in both sympatric *D. flavomontana* population types, 2-  
 515 methyl-branched alkanes and/or alkadienes had a large contribution to sex differences, which  
 516 indicates a signal function of these compound classes. The relative amounts of these compounds were  
 517 higher in males than in females (Table S14).

518 Table 1. The most influential CHC substances based on random forest analysis (see Fig. S2). Most of the  
 519 compounds included alkenes with different numbers of carbons and different double-bond positions in a chain,  
 520 while in *D. flavomontana* sympatric populations class of 2-methyl-branched alkanes and/or alkadienes have a  
 521 large contribution on sex differences.

| Random forest analysis                                  | Allopatry                         | Sympatry F                                        | Sympatry M                                                             |
|---------------------------------------------------------|-----------------------------------|---------------------------------------------------|------------------------------------------------------------------------|
| Between <i>D. montana</i><br>and <i>D. flavomontana</i> | 2methylC24-alkane<br>C27-alkene 3 | C27-alkene 1<br>C27-alkene 3                      | C27-alkene 2<br>2methylC24-alkane                                      |
| Between sexes of<br><i>D. montana</i>                   | C25-alkene 2<br>C29-alkene 1      | C25-alkene 4<br>C29-alkadiene 2                   | C27-alkene 2<br>C29-alkene 2                                           |
| Between sexes of<br><i>D. flavomontana</i>              | C27-alkene 5<br>C25-alkene 4      | 2methylC28-alkane/C29-alkadiene 5<br>C27-alkene 2 | 2methylC28-alkane/C29-alkadiene 5<br>2methylC30-alkane/C31-alkadiene 4 |

## 523 POSTMATING PREZYGOTIC (PMPZ) BARRIERS

524 The strength of PMPZ barriers was determined by quantifying the amount of sperm in female sperm  
 525 storage organs after mating, as well as female fecundity and egg fertilization in intra- and inter-  
 526 specific crosses. The presence and amount of sperm in female sperm storage organs depends on  
 527 whether sperm is transferred during mating and/or whether females store and/or deplete sperm. All  
 528 *D. montana* females had fewer sperm when mating with heterospecific than conspecific males (Fig.  
 529 8A, Table S15). Allopatric and Sympatry F *D. flavomontana* females stored sperm equally well  
 530 regardless of whether it was received from con- or heterospecific males, while Sympatry M females  
 531 had fewer sperm when mating with heterospecific than conspecific males (Fig. 8A, Table S15). Also,  
 532 in interspecific crosses, sperm was more successfully transferred and stored in *D. flavomontana* than  
 533 in *D. montana* females in all population types (Fig. 8A, Table S15).

534 Sexually mature *D. montana* and *D. flavomontana* females can lay eggs as virgins. We tested whether  
 535 presence of sperm (yes, no) increases female egg laying in intra- and inter- specific crosses. Statistical  
 536 tests were done to the combined data without population type division since it did not explain the data  
 537 statistically. Presence of sperm in intraspecific matings increased females' average egg production in  
 538 both species (*D. montana* -  $13 \pm 1$  (sperm absent) to  $21 \pm 2$  (sperm present) eggs, GLMM,  $z_{129} = 2.02$ ,  
 539  $P = 0.044$ ; *D. flavomontana* -  $5 \pm 1$  (sperm absent) to  $12 \pm 2$  (sperm present) eggs, GLMM,  $z_{129} =$   
 540  $2.54$ ,  $P = 0.010$ ). However, in interspecific matings, male sperm did not increase fecundity in either  
 541 species (GLMM, *D. montana*:  $z_{45} = 0.41$ ,  $P = 0.680$ ; *D. flavomontana*: GLMM,  $z_{182} = 1.64$ ,  $P = 0.100$ ).

542 The proportion of hatched eggs in reciprocal crosses between species was low (*D. montana* females  
 543 and *D. flavomontana* males = 0.00-0.01; *D. flavomontana* females and *D. montana* males = 0.01-  
 544 0.03) and significantly lower than in intraspecific crosses (*D. montana* = 0.73-0.83; *D. flavomontana*  
 545 = 0.80-0.91; Fig. 8B, Table S15). Also, in interspecific crosses, proportion of hatched eggs was higher

546 in *D. flavomontana* than in *D. montana* females in Allopatry, but not in sympatries (Fig. 8A, Table  
547 S15).

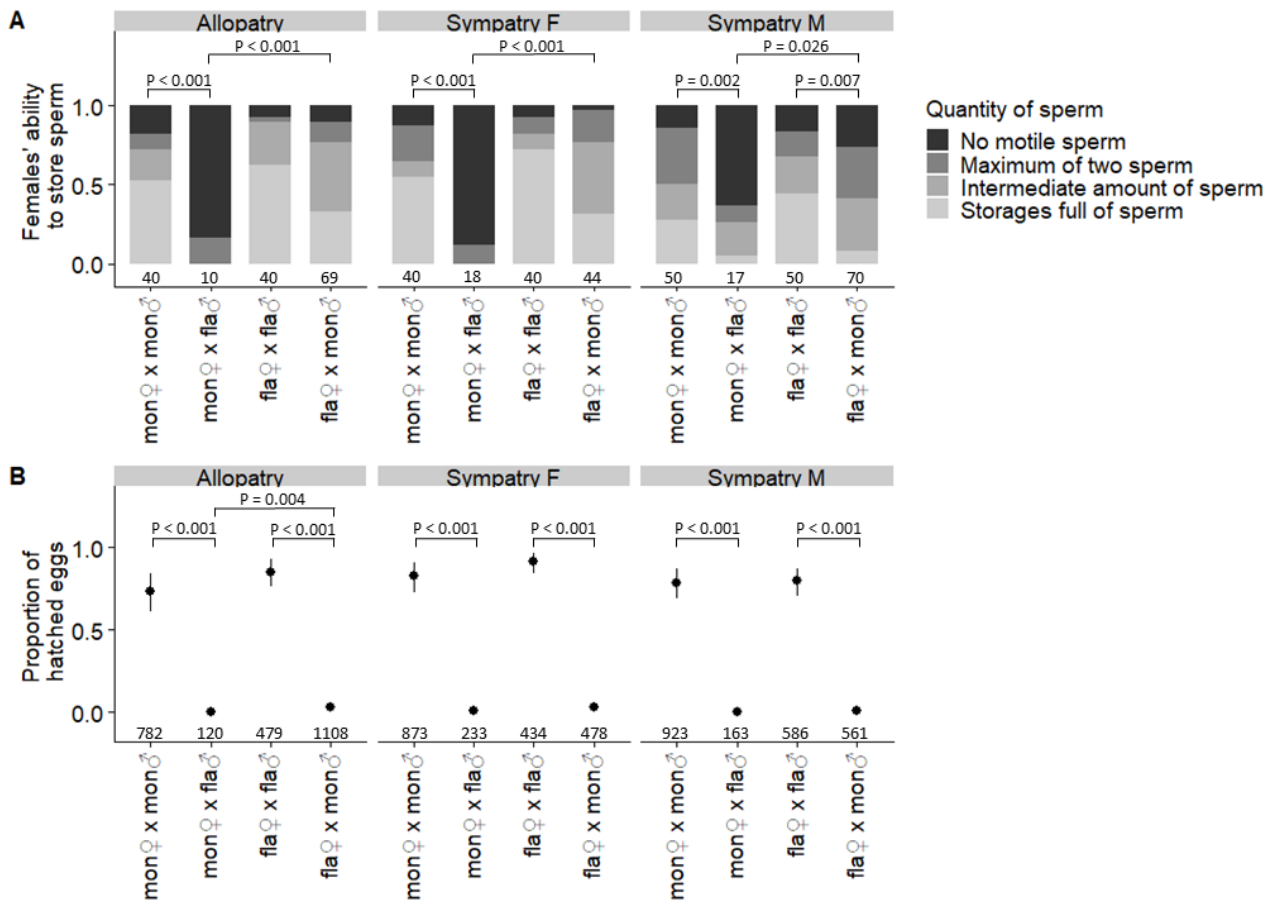

548

549 Figure 8. PMPZ barriers in the transfer and/or storage of sperm and the proportion of hatched eggs. (A) The  
550 transfer and/or storage of sperm was lower in all crosses between *D. montana* females and *D. flavomontana*  
551 males compared to intraspecific controls or reciprocal crosses. Sympatry M *D. flavomontana* females had  
552 fewer sperm when mating with heterospecific than conspecific males, but Allopatric and Sympatry F females  
553 stored both hetero- and con -specific sperm equally well. Numbers above x-axis refer to the number of studied  
554 females in each cross. (B) Proportion of hatched eggs was lower in all interspecific crosses than in intraspecific  
555 ones, and in Allopatry it was lower between *D. montana* females and *D. flavomontana* males than in the  
556 reciprocal ones. Numbers above x-axis refer to the number of studied eggs in each cross. Error bars represent  
557 bootstrapped 95% confidence intervals.

558 The low proportion of hatched eggs in crosses between *D. flavomontana* females and *D. montana*  
559 males was due to fertilization failure rather than fertilization followed by genetic incompatibility (Fig.  
560 9). On average, only 1.3 – 5.1 % of the eggs were developing and eggs that failed the development  
561 criteria did not contain sperm. This PMPZ barrier was 4.1 and 3.9 times stronger in Sympatry M than

562 in either Allopatry or Sympatry F, respectively, but Sympatry F did not differ from Allopatry (Fig. 9,  
563 Table S16).

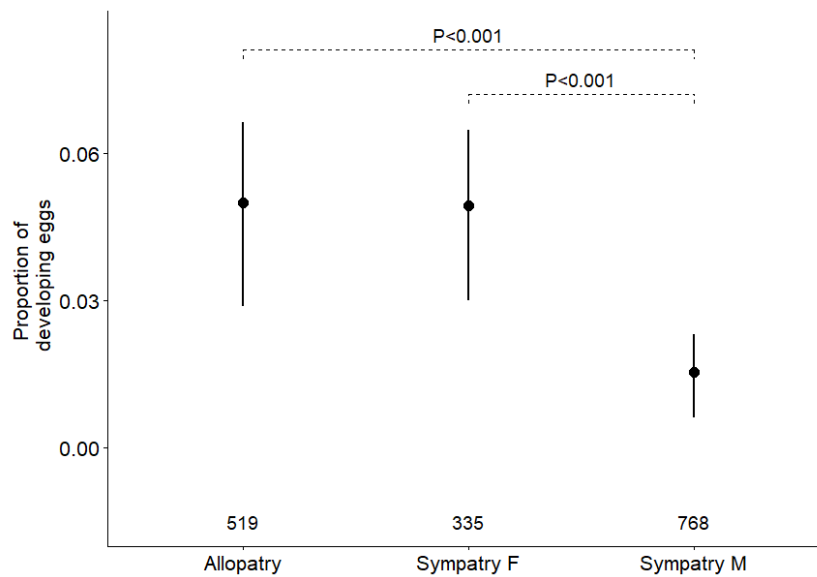

564

565 Figure 9. In crosses between *D. flavomontana* females and *D. montana* males, DAPI staining and microscopy  
566 revealed significantly stronger PMPZ isolation at the level of egg fertilization and development in Sympatry  
567 M compared to Allopatry or Sympatry F. Numbers above x-axis represent the number of studied eggs. Error  
568 bars represent bootstrapped 95% confidence intervals.

569 Reinforcement of PMPZ barriers was also detected in crosses between different types of *D.*  
570 *flavomontana* populations. Proportion of developing eggs was significantly reduced in crosses  
571 between Sympatry F females mated to Sympatry M males, and those between Sympatry M females  
572 and Allopatric males, compared to the other crosses for the given female types (Fig. 10, Table S17).  
573 As in interspecific crosses, none of the non-developing eggs contained sperm.

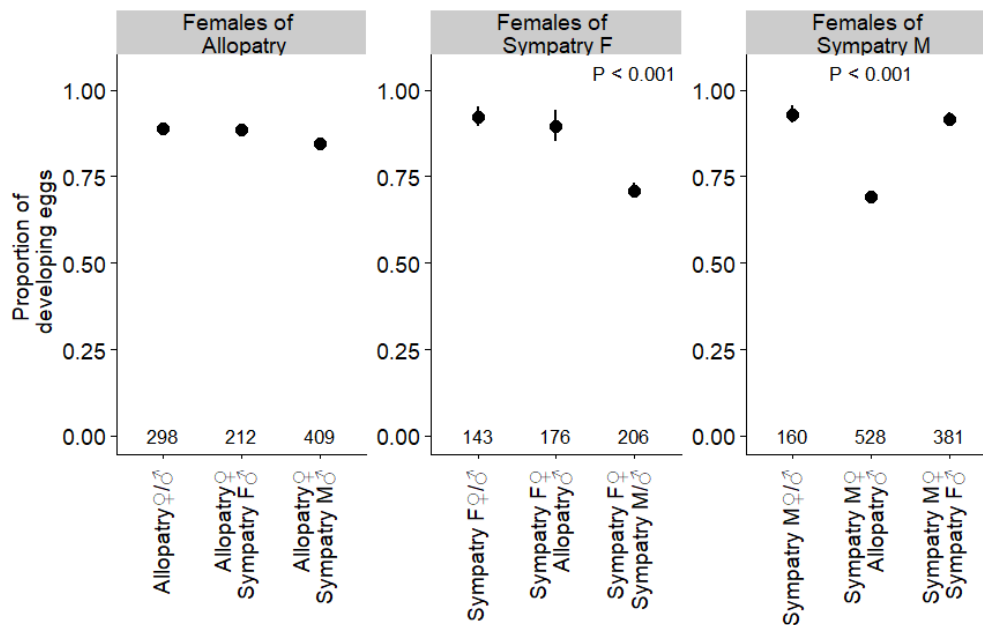

574

575 Figure 10. Proportion of developing eggs in crosses between *D. flavomontana* flies from different population  
 576 types. Numbers above x-axis represent the number of eggs examined. Error bars represent bootstrapped 95%  
 577 confidence intervals.

## 578 THE REINFORCEMENT OF PREZYGOTIC BARRIERS

579 Sexual and PMPZ barriers between *D. montana* females and *D. flavomontana* males were almost  
 580 complete in all population types, leaving no space for reinforcement to occur. To find out whether  
 581 the costs involved in matings between *D. flavomontana* females and *D. montana* males had reinforced  
 582 prezygotic reproductive barriers in sympatric populations and promoted character displacement  
 583 between *D. flavomontana* populations, RI (Reproductive Isolation; Sobel and Chen 2014) was  
 584 calculated separately for sexual and PMPZ isolation:

$$585 \quad RI_{4A} = 1 - 2 \times (H / (H + C))$$

586 where *H* stands for heterospecific and *C* for conspecific cases

587 The strength of sexual isolation between *D. flavomontana* females and *D. montana* males was  
 588 calculated from no-choice results, as these reflect female discrimination and the strength of isolation  
 589 better than multiple-choice tests (flies are not influenced by conspecific mating cues from other  
 590 courting pairs). The strength of sexual isolation between *D. flavomontana* populations was calculated  
 591 from multiple-choice results (Table S8). Calculation of the strength of PMPZ isolation was based on  
 592 the proportion of developing eggs, which includes failures in sperm transfer and/or storage and egg  
 593 fertilization. RI-values obtained for individual strain pairs were averaged to produce a joint value in  
 594 each population type.



595 Sexual and PMPZ isolation between *D. flavomontana* females and *D. montana* males varied by  
 596 population type (Fig. 11A). Sexual isolation was stronger in Sympatry F than in either Allopatry or  
 597 Sympatry M whereas PMPZ isolation was stronger in Sympatry M than in either Allopatry or  
 598 Sympatry F. Thus, in crosses where sexual isolation is less effective, PMPZ barriers could block  
 599 interspecific gene flow. Reinforcement of sexual isolation had far-reaching effects in promoting  
 600 sexual isolation between *D. flavomontana* populations, Sympatry F females discriminating against  
 601 males of the other populations (Fig. 11B). Similarly, some populations pairs including Sympatry M  
 602 individuals had slightly increased PMPZ isolation compared to other population pairs (Fig. 11B).

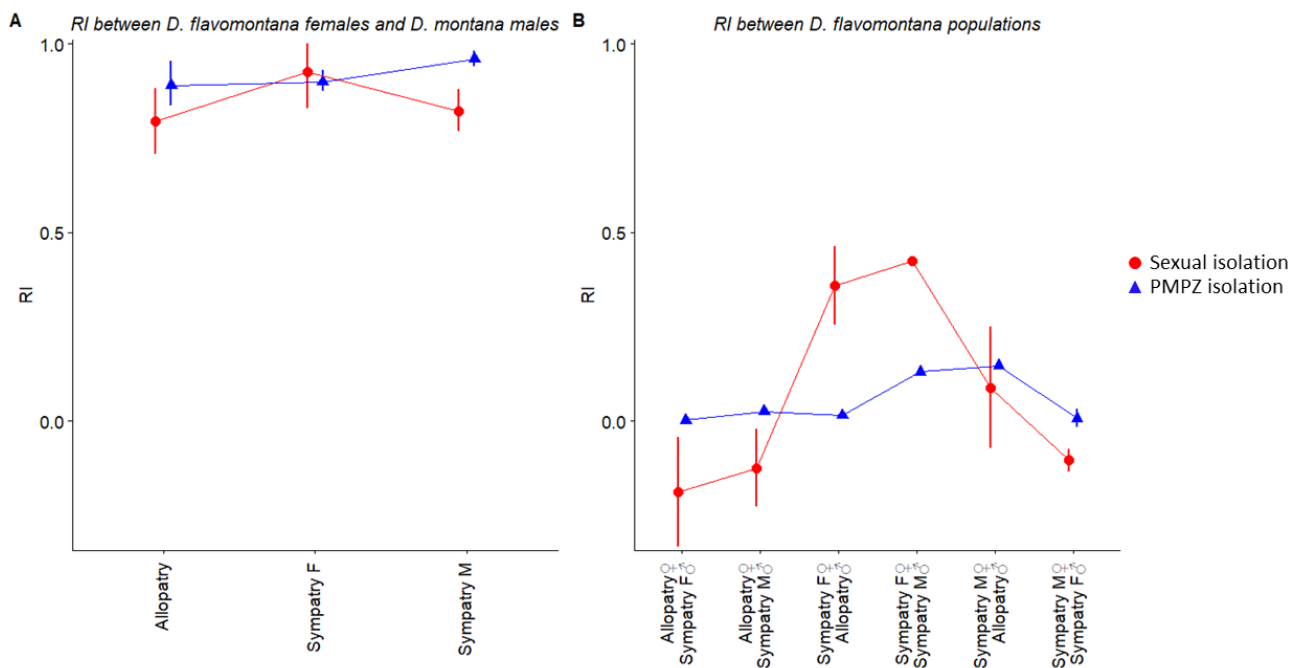

603  
 604 Figure 11. Reproductive isolation indices (RIs) calculated for sexual isolation and PMPZ isolation in different  
 605 population types between *D. flavomontana* females and *D. montana* males and between populations of *D.*  
 606 *flavomontana*. (A) In crosses between *D. flavomontana* females and *D. montana* males, sexual isolation was  
 607 strongest in Sympatry F, while PMPZ isolation was strongest in Sympatry M. (B) Sexual and PMPZ isolation  
 608 between *D. flavomontana* populations followed the same patterns as in interspecific matings: Sympatry F  
 609 females discriminated against males of other populations (sexual isolation) and Sympatry M individuals  
 610 showed lowered fertilization with some other conspecific population types (PMPZ isolation).

611 Reduction in gene flow resulting from prezygotic isolation (composite index) was calculated as in  
 612 Turissini et al. (2015):

$$613 \text{ Gene flow} = (1 - I_{\text{Sexual isolation}}) \times (1 - I_{\text{PMPZ isolation}})$$

614 where  $I_{\text{Sexual isolation}}$  is index of sexual isolation and  $I_{\text{PMPZ isolation}}$  index of PMPZ isolation

615 Given RI between *D. flavomontana* females and *D. montana* males, some gene flow may occur  
616 between species and this depends on population type. More gene flow is possible between individuals  
617 from Allopatric populations (0.027) compared to crosses in either Sympatric populations (Sympatry  
618 F = 0.005: Sympatry M = 0.009). A slight reduction in gene flow between *D. flavomontana*  
619 populations was evident between Sympatry F females and Allopatric males (0.632) or Sympatry M  
620 males (0.499), and between Sympatry M females and Allopatric males (0.776). Otherwise the  
621 probability for gene flow was 1 or higher.

## 622 *Discussion*

623 Reinforcement of prezygotic reproductive barriers can enhance speciation both by strengthening  
624 reproductive isolation between sympatric species and by inducing divergence of reproductive traits  
625 between populations of the same species that live within and outside the area of sympatry (Howard  
626 1993; Ortiz-Barrientos et al. 2009). A prerequisite for reinforcement is that postzygotic reproductive  
627 isolation is not complete, and producing interspecific hybrids is costly. In our study, postzygotic  
628 reproductive isolation between *D. montana* females and *D. flavomontana* males was nearly complete  
629 in all populations, leaving no chance for reinforcement to be currently acting. We also found in this  
630 cross nearly complete prezygotic isolation, potentially affected by reinforcement in the past.  
631 However, in crosses between *D. flavomontana* females and *D. montana* males both F<sub>1</sub> hybrid viability  
632 and fertility was lower than in intraspecific crosses, providing the opportunity for reinforcement to  
633 occur. We subsequently found that the strength of sexual and PMPZ barriers varied between  
634 population types, as predicted for reinforcement. Yukilevich (2012) showed that concordant pre- and  
635 postzygotic isolation asymmetries in sympatry may have affected 60–83% of all sympatric  
636 *Drosophila* species and that they have enhanced premating isolation by 18–26%, on average. In  
637 crosses between *D. flavomontana* females and *D. montana* males, premating sexual isolation was  
638 27% stronger in sympatric Rocky Mountains populations (Sympatry F) than in Allopatry, and PMPZ  
639 isolation was 25% stronger in sympatric western coast populations (Sympatry M) than in Allopatry.

640 We utilized a study system in which we could assess variation in patterns of reproductive isolation  
641 between populations with different sympatric histories and species abundancies compared with  
642 isolation between allopatric populations. Our first prediction was that in sympatric Rocky Mountains  
643 populations, where *D. flavomontana* is abundant (Sympatry F) and where the ancestral populations  
644 of both species are likely to be located (Stone et al. 1960), reinforcement is targeted on premating  
645 sexual isolation to minimize disadvantageous reproductive interactions with heterospecifics.  
646 Reinforcement of sexual isolation was predicted to increase female *D. flavomontana* discrimination

647 against *D. montana* males, resulting in reproductive character displacement between and within the  
648 species in *D. flavomontana*'s key courtship cues and to generate sexual isolation between *D.*  
649 *flavomontana* populations (Fig. 1). Our data supported these predictions. In sympatric Rocky  
650 Mountains populations, reinforcement of sexual isolation between *D. flavomontana* females and *D.*  
651 *montana* males was detected as increased discrimination of *D. flavomontana* females against males  
652 of both *D. montana* and other *D. flavomontana* populations and as increased differences in *D.*  
653 *flavomontana*'s key courtship cues, CHC profiles, between the two species and among the sexes. This  
654 work contributes to other research demonstrating reinforcement targeting on sexual isolation between  
655 sympatric species (e.g. Noor 1995; Saetre et al. 1997; Rundle and Schluter 1998; Hoskin et al. 2005;  
656 Jaenike et al. 2006; Kronforst et al. 2007) and between populations of the same species (e.g. Lemmon  
657 2009; Bewick and Dyer 2014; Kozak et al. 2015).

658 Our second prediction was that in sympatric western coast populations, where *D. flavomontana* is a  
659 new invader and still rare (Sympatry M), reinforcement can be targeted either on sexual or PMPZ  
660 barriers, depending on whether female *D. flavomontana* maintain high species-discrimination ability  
661 when rare (Fig. 1). Reinforcement was assumed to target sexual isolation and have similar  
662 consequences as in sympatric Rocky Mountains populations when female species-discrimination  
663 remains high even when females are from the rarer species. If, however, female mate recognition or  
664 preference has decreased due to the lack of conspecific mating partners, then reinforcement was  
665 predicted to be targeted on PMPZ barriers and to induce reproductive character displacement in traits  
666 maintaining these barriers both between the species and between *D. flavomontana* populations (Fig.  
667 1). Results on sexual and PMPZ barriers in these populations fully support the second prediction;  
668 only PMPZ barriers, including the transfer/storage and/or use of heterospecific sperm in fertilization,  
669 showed signs of reinforcement in Sympatry M. Furthermore, *D. flavomontana* populations showed  
670 PMPZ barriers in the proportion of developing eggs in crosses between Sympatry M females and  
671 allopatric males and between Sympatry M males and Sympatry F females, indicating potential far-  
672 reaching effects of reinforcement also on *D. flavomontana* populations. Turissini et al. (2018)  
673 suggested that natural and sexual selection can drive the evolution of PMPZ barriers when  
674 reinforcement of sexual isolation is not possible, but our study is the first to demonstrate this.

675 One interesting difference between *D. montana* and *D. flavomontana* is that their species-recognition  
676 relies on different sensory modalities, with *D. montana* females using mainly auditory cues (male  
677 courtship song) and *D. flavomontana* females olfactory cues (CHCs). Female *D. montana* rarely  
678 accepts a male without hearing his courtship song, and can be fooled into mating with muted  
679 (wingless) heterospecific males by playing them conspecific song (Liimatainen et al. 1992; Saarikettu

680 et al. 2005). *D. montana* song (mainly its carrier frequency and other sound pulse characters) also  
681 plays a major role in sexual selection (Ritchie et al. 1998) and both the song frequency and female  
682 preference for frequency varies between geographically isolated populations (Klappert et al. 2007).  
683 Thus, the variation we describe in male song frequency and the number of cycles in a sound pulse  
684 between *D. montana* populations with different evolutionary histories of overlap with *D.*  
685 *flavomontana* is likely to be due to sexual selection within the species rather than to reinforcement.  
686 For *D. flavomontana* females, CHCs were more important than song, but females mated even without  
687 receiving these cues through their antennal sense organs. Divergence between *D. flavomontana*  
688 populations and sexes in CHCs show clear signs of reinforcement at both species and population  
689 levels. While most of the cuticular substances were rather generic (occur in many insect species) and  
690 were found in most of our specimens, the methyl-branched alkanes made an interesting exception by  
691 being present only in *D. flavomontana*'s sympatric populations, and thus possibly playing an  
692 important role in the evolution of mate choice. Giglio and Dyer (2013) have detected shifts in male  
693 and female sensory modalities in the use of olfactory and gustatory cues between *Drosophila recens*  
694 and *Drosophila subquinaria*, as well as between *D. subquinaria* populations that are sympatric or  
695 allopatric with *D. recens*. They speculate that selection may have acted on sympatric *D. subquinaria*  
696 males to increase discrimination for species recognition by shifting the sensory cues females prefer  
697 for mating. Mate choice of *D. montana* and *D. flavomontana* from all population types relied on the  
698 same cues (auditory vs. olfactory), which suggests that the divergence in the use of these cues is not  
699 of recent origin.

700 PMPZ barriers occurring after mating, but before zygote formation, have only recently received  
701 attention as important suppressors of interspecific gene flow. Reinforcement of these barriers may,  
702 however, be a common and also quite rapid process (Castillo and Moyle 2014; Comeault et al. 2016;  
703 Turissini et al. 2018). For example, Matute (2010) detected an increase in PMPZ isolation between  
704 *D. yakuba* and *D. santomea* in sympatry, in which *D. yakuba* females depleted the sperm of *D.*  
705 *santomea* males faster than that of conspecific males. Here, we found PMPZ barriers were evident in  
706 both species in the receipt and/or storage of heterospecific sperm and in the effectiveness of the  
707 ejaculate in enhancing female egg laying and fertilization. Problems in sperm transfer and storage in  
708 the reciprocal crosses between *D. montana* and *D. flavomontana* could be partly due to species  
709 differences in female seminal receptacle length (*D. montana*: 3.43 mm; *D. flavomontana*: 10.54 mm)  
710 which positively correlates with sperm length (*D. montana*: 3.34 mm; *D. flavomontana*: 5.53 mm,  
711 Pitnick et al. 1999). Sperm storage, especially in matings between *D. montana* females and *D.*  
712 *flavomontana* males, may be diminished because the longer sperm of *D. flavomontana* may not

713 properly interact with the shorter seminal receptacles of *D. montana*. If sperm are stored, reduced  
714 fertilization could be due to sperm not being able to be released from storage for fertilization and/or  
715 impairing penetration of the egg membrane after release (Howard 1999; Wirtz 1999; Lawniczak and  
716 Begun 2007; Howard et al. 2009; Kelleher et al. 2009). Reduction in fertilization was detected  
717 between *D. flavomontana* females and *D. montana* males, as well as between *D. flavomontana* from  
718 Sympatry M and other conspecific population types. PMPZ barriers have also been detected in other  
719 members of the *D. virilis* group, both between species (Sweigart 2010; Sagga and Civetta 2011;  
720 Ahmed-Braimah and McAllister 2012) and between *D. montana* populations from different  
721 geographical regions (Jennings et al. 2014b; Garlovsky and Snook 2018). Finally, ejaculate transfer  
722 to females may also induce an insemination reaction, in which a mass forms in the vagina that inhibits  
723 sperm storage and blocks oviposition (Patterson 1946; Knowles and Markow 2001). Insemination  
724 reactions have been detected in *D. montana* females after intraspecific matings (Wheeler 1947) and  
725 could be even more pronounced after mating with *D. flavomontana* males.

726 Several studies (e.g. Whitney et al. 2006; Abbott et al. 2013; Harrison and Larson 2014) have shown  
727 that incomplete reproductive barriers between sympatric species can lead to gradual incorporation of  
728 alleles from one species into the gene pool of a second one, which can enhance adaptation to new  
729 environmental conditions (Seehausen 2004; Currat et al. 2008; Abbott et al. 2013). Gene flow was  
730 estimated to be highest in crosses between allopatric *D. flavomontana* females and *D. montana* males,  
731 as predicted when reinforcement should not be acting, and reduced in these crosses from sympatric  
732 populations regardless of species abundance, as predicted when reinforcement is acting. Our next  
733 goal will be to quantify the magnitude and direction of gene flow between *D. montana* and *D.*  
734 *flavomontana* across these populations using whole-genome sequencing combined with studies on  
735 stress tolerances and habitat preferences. These studies will help to determine whether the species  
736 have received adaptive gene complexes from each other, and whether this could explain recent shifts  
737 in species distributions.

738 Ecological divergence is usually regarded as a prerequisite for the evolution of reproductive isolation  
739 through reinforcement (see Schluter 2009). The most notable ecological differences between  
740 *D. montana* and *D. flavomontana* are found in host-tree specialization and climatic adaptations  
741 (Patterson 1952). These differences could have played an important role during the first steps of  
742 speciation, giving the diverging species time to evolve reproductive barriers before being able to  
743 establish sympatry. *D. montana* populations on the western coast have adapted to live on lower  
744 altitudes, like *D. flavomontana*, and here the habitat differences between species are smaller than in

745 the Rocky Mountains. Even though some of the populations may have been sympatric or allopatric  
746 for a shorter time than the others, comparisons between population types show clear signs of  
747 reinforcement. As Coyne and Orr (1997) state, the striking increase in prezygotic isolation seen in  
748 virtually all sympatric taxa suggests that the effect of sympatry is not only profound but also rapid.

749 In conclusion, reinforcement has been shown to play a key role both in enhancing and strengthening  
750 existing species boundaries, and the field of speciation is now beginning to evaluate not only the  
751 conditions under which reinforcement occurs but also its broader evolutionary and ecological  
752 consequences (Pfennig 2016). Speciation research also needs to consider the origin of barrier effects  
753 and the ways in which they are coupled, as strong barriers to gene flow will evolve only if multiple  
754 barrier effects coincide (Butlin and Smadja 2018). We show here that the target of reinforcement may  
755 change from sexual isolation to PMPZ barriers, if female discrimination towards heterospecific males  
756 decreases when the females are from the rarer species, and that the consequences of this change also  
757 can be detected between conspecific populations. Accordingly, we argue that the reliance of  
758 reproductive isolation on multiple barriers is also beneficial because the barriers can compensate each  
759 other in situations where reinforcement of some barriers is restricted.

## 760 *Acknowledgements*

761 We would like to thank H. Järvinen for her help with the experiments, and people in the laboratory  
762 for the fly maintenance. We also thank E. Virtanen, A. Hiillos and E. Övermark for their contribution  
763 in Wolbachia studies. This work was supported by the grants from Academy of Finland (project  
764 132619) and Ella and Georg Ehrnrooth Foundation to Anneli Hoikkala and Academy of Finland  
765 (projects 268214 and 272927) to Maaria Kankare.

766 *References*

- 767 Abbott, R., D. Albach, S. Ansell, J. W. Arntzen, S. J. E. Baird, N. Bierne, J. Boughman, A. Brelsford, C. A.  
768 Buerkle, R. Buggs, R. K. Butlin, U. Dieckmann, F. Eroukhmanoff, A. Grill, S. H. Cahan, J. S.  
769 Hermansen, G. Hewitt, A. G. Hudson, C. Jiggins, J. Jones, B. Keller, T. Marczewski, J. Mallet, P.  
770 Martinez-Rodriguez, M. Möst, S. Mullen, R. Nichols, A. W. Nolte, C. Parisod, K. Pfennig, A. M. Rice,  
771 M. G. Ritchie, B. Seifert, C. M. Smadja, R. Stelkens, J. M. Szymura, R. Väinölä, J. B. W. Wolf, and D.  
772 Zinner. 2013. Hybridization and speciation. *J. Evol. Biol.* 26:229–246.
- 773 Ahmed-Braimah, Y. H., and B. F. McAllister. 2012. Rapid evolution of assortative fertilization between  
774 recently allopatric species of *Drosophila*. *Int. J. Evol. Biol.* 1–9.
- 775 Arnold, M. L., and N. H. Martin. 2009. Adaptation by introgression. *J. Biol.* 8:82.
- 776 Bernier, U. R., D. A. Carlson, and C. J. Geden. 1998. Gas chromatography/mass spectrometry analysis of the  
777 cuticular hydrocarbons from parasitic wasps of the genus *Muscidifurax*. *J. Am. Soc. Mass Spectrom.*  
778 9:320–332.
- 779 Bewick, E. R., and K. A. Dyer. 2014. Reinforcement shapes clines in female mate discrimination in  
780 *Drosophila subquinaria*. *Evolution.* 68:3082–3094.
- 781 Butlin, R. K., J. Galindo, and J. W. Grahame. 2008. Review. Sympatric, parapatric or allopatric: The most  
782 important way to classify speciation? *Philos. Trans. R. Soc. B Biol. Sci.* 363:2997–3007.
- 783 Butlin, R. K., and C. M. Smadja. 2018. Coupling, reinforcement, and speciation. *Am. Nat.* 191:155–172.
- 784 Carlson, J. R. 1996. Olfaction in *Drosophila*: From odor to behavior. *Trends Genet.* 12:175–180.
- 785 Carvajal-Rodriguez, A., and E. Rolan-Alvarez. 2006. JMATING: A software for the analysis of sexual  
786 selection and sexual isolation effects from mating frequency data. *BMC Evol. Biol.* 6:40.
- 787 Castillo, D. M., and L. C. Moyle. 2017. Conspecific sperm precedence is reinforced but sexual selection  
788 weakened in sympatric populations of *Drosophila*. bioRxiv 071886.
- 789 Castillo, D. M., and L. C. Moyle. 2014. Intraspecific sperm competition genes enforce post-mating species  
790 barriers in *Drosophila*. *Proc. R. Soc. B Biol. Sci.* 281:20142050.
- 791 Chenoweth, S. F., and M. W. Blows. 2006. Dissecting the complex genetic basis of mate choice. *Nat. Rev.*  
792 *Genet.* 7:681–692.
- 793 Christensen, R. H. B. 2018. Cumulative link models for ordinal regression with the R package ordinal.  
794 Submitted in *J. Stat. Software*.
- 795 Clark, N. L., J. E. Aagaard, and W. J. Swanson. 2006. Evolution of reproductive proteins from animals and

- 796 plants. *Reproduction* 131:11–22.
- 797 Colyott, K., C. Odu, and J. M. Gleason. 2016. Dissection of signalling modalities and courtship timing  
798 reveals a novel signal in *Drosophila saltans* courtship. *Anim. Behav.* 120:93–101.
- 799 Comeault, A. A., A. Venkat, D. R. Matute. 2016. Correlated evolution of male and female reproductive traits  
800 drive a cascading effect of reinforcement in *Drosophila yakuba*. *Proc. Biol. Sci.* 283:23–48.
- 801 Coyne, J. A., and A. Orr. 1997. “Patterns of speciation in *Drosophila*” revisited. *Evolution.* 51:295–303.
- 802 Coyne, J. A., and A. H. Orr. 2004. *Speciation*. Sinauer Associates, Sunderland, MA.
- 803 Currat, M., M. Ruedi, R. J. Petit, and L. Excoffier. 2008. The hidden side of invasions: Massive introgression  
804 by local genes. *Evolution.* 62:1908–1920.
- 805 Dobzhansky, T. 1940. Speciation as a stage in evolutionary divergence. *Am. Nat.* 74:312–321.
- 806 Ferveur, J. F. 2005. Cuticular hydrocarbons: Their evolution and roles in *Drosophila* pheromonal  
807 communication. *Behav. Genet.* 35:279–295.
- 808 Garlovsky, M. D., and R. R. Snook. 2018. Persistent postmating, prezygotic reproductive isolation between  
809 populations. *Ecol. Evol.* 1–12.
- 810 Giglio, E. M., and K. A. Dyer. 2013. Divergence of premating behaviors in the closely related species  
811 *Drosophila subquinaria* and *D. recens*. *Ecol. Evol.* 3:365–374.
- 812 Gleason, J. M., A. A. Pierce, A. L. Vezeau, and S. F. Goodman. 2012. Different sensory modalities are  
813 required for successful courtship in two species of the *Drosophila willistoni* group. *Anim. Behav.*  
814 83:217–227.
- 815 Harrison, R. G., and E. L. Larson. 2014. Hybridization, introgression, and the nature of species boundaries. *J.*  
816 *Hered.* 105:795–809.
- 817 Hoskin, C. J., and M. Higgie. 2010. Speciation via species interactions: The divergence of mating traits  
818 within species. *Ecol. Lett.* 13:409–420.
- 819 Hoskin, C. J., M. Higgie, K. R. McDonald, and C. Moritz. 2005. Reinforcement drives rapid allopatric  
820 speciation. *Nature* 437:1353–1356.
- 821 Howard, D. J. 1999. Conspecific sperm and pollen precedence and speciation. *Annu. Rev. Ecol. Syst.*  
822 30:109–132.
- 823 Howard, D. J. 1993. Reinforcement: Origin, dynamics, and fate of an evolutionary hypothesis. Pp. 46–69 in  
824 R.G. Harrison, ed. *Hybrid zones and the evolutionary process*. Oxford University Press, NY.
- 825 Howard, D. J., S. R. Palumbi, L. M. Birge, and M. K. Manier. 2009. Sperm and speciation. Pp. 367–403 in



- 826 T.R. Birkhead, D.J. Hosken and S.Pitnick, eds. Sperm Biology, an evolutionary perspective. Academic  
827 Press.
- 828 Jaenike, J., K. A. Dyer, C. Cornish, and M. S. Minhas. 2006. Asymmetrical reinforcement and Wolbachia  
829 infection in *Drosophila*. PLoS Biol. 4:1852–1862.
- 830 Jennings, J. H., W. J. Etges, T. Schmitt, and A. Hoikkala. 2014a. Cuticular hydrocarbons of *Drosophila*  
831 *montana*: Geographic variation, sexual dimorphism and potential roles as pheromones. J. Insect  
832 Physiol. 61:16–24.
- 833 Jennings, J. H., R. R. Snook, and A. Hoikkala. 2014b. Reproductive isolation among allopatric *Drosophila*  
834 *montana* populations. Evolution. 68:3095–3108.
- 835 Kelleher, E. S., T. D. Watts, B. A. LaFlamme, P. A. Haynes, and T. A. Markow. 2009. Proteomic analysis of  
836 *Drosophila mojavensis* male accessory glands suggests novel classes of seminal fluid proteins. Insect  
837 Biochem. Mol. Biol. 39:366–371.
- 838 Klappert, K., D. Mazzi, A. Hoikkala, and M. G. Ritchie. 2007. Male courtship song and female preference  
839 variation between phylogeographically distinct populations of *Drosophila montana*. Evolution.  
840 61:1481–1488.
- 841 Knowles, L. L., and T. A. Markow. 2001. Sexually antagonistic coevolution of a postmating-prezygotic  
842 reproductive character in desert *Drosophila*. Proc. Natl. Acad. Sci. 98:8692–8696.
- 843 Kozak, G. M., G. Roland, C. Rankhorn, A. Falater, E. Berdan, and R. Fuller. 2015. Behavioral isolation due  
844 to cascade reinforcement in *Lucania killifish*. Am. Nat. 185:491–506.
- 845 Kronforst, M. R., L. G. Young, and L. E. Gilbert. 2007. Reinforcement of mate preference among  
846 hybridizing *Heliconius* butterflies. J. Evol. Biol. 20:278–285.
- 847 Lawniczak, M. K. N., and D. J. Begun. 2007. Molecular population genetics of female-expressed mating-  
848 induced serine proteases in *Drosophila melanogaster*. Mol. Biol. Evol. 24:1944–1951.
- 849 Lemmon, E. M. 2009. Diversification of conspecific signals in sympatry: Geographic overlap drives  
850 multidimensional reproductive character displacement in frogs. Evolution. 63:1155–1170.
- 851 Liaw, A. and Wiener, M. 2002. Classification and regression by randomForest. R news. 2:18–22.
- 852 Liimatainen, J., A. Hoikkala, J. Aspi, and P. Welbergen. 1992. Courtship in *Drosophila montana*: the effects  
853 of male auditory signals on the behaviour of flies. Anim. Behav. 43:35–48.
- 854 Matute, D. R. 2010. Reinforcement of gametic isolation in *Drosophila*. PLoS Biol. 8:e1000341.
- 855 Matute, D. R. 2014. The magnitude of behavioral isolation is affected by characteristics of the mating  
856 community. Ecology and evolution. 4:2945–2956.

- 857 Mazzi, D., J. Kesäniemi, A. Hoikkala, and K. Klappert. 2009. Sexual conflict over the duration of copulation  
858 in *Drosophila montana*: Why is longer better? BMC Evol. Biol. 9:132.
- 859 Morales-hojas, R., M. Reis, C. P. Vieira, and J. Vieira. 2011. Molecular phylogenetics and evolution  
860 resolving the phylogenetic relationships and evolutionary history of the *Drosophila virilis* group using  
861 multilocus data. Mol. Phylogenet. Evol. 60:249–258.
- 862 Noor, M. A. 1995. Speciation driven by natural selection in *Drosophila*. Nature 375:674.
- 863 Noor, M. A. F. 1999. Reinforcement and other consequences of sympatry. Heredity. 83:503–508.
- 864 Nosil, P. 2012. Ecological Speciation. Oxford University Press, NY.
- 865 Nosil, P., L. J. Harmon, and O. Seehausen. 2009. Ecological explanations for (incomplete) speciation.  
866 Trends Ecol. Evol. 24:145–156.
- 867 Ortiz-Barrientos, D., A. Grealy, and P. Nosil. 2009. The genetics and ecology of reinforcement: Implications  
868 for the evolution of prezygotic isolation in sympatry and beyond. Ann. N. Y. Acad. Sci. 1168:156–182.
- 869 Päällysaho, S., J. Aspi, J. O. Liimatainen, and A. Hoikkala. 2003. Role of X chromosomal song genes in the  
870 evolution of species-specific courtship songs in *Drosophila virilis* group species. Behav. Genet. 33:25–  
871 32.
- 872 Patterson, J. 1946. A new type of isolating mechanism in *Drosophila*. Proc. Natl. Acad. Sci. 32:202–208.
- 873 Patterson, J. 1952. Revision of the montana complex of the virilis species group. University Texas Publ.  
874 5204:20–34.
- 875 Pfennig, K. S. 2016. Reinforcement as an initiator of population divergence and speciation. Curr. Zool.  
876 62:145–154.
- 877 Pinheiro J., Bates D., DebRoy S., Sarkar D. and R Core Team 2018. nlme: Linear and nonlinear mixed  
878 effects models. R package version 3.1-137, <https://CRAN.R-project.org/package=nlme>.
- 879 Pitnick, S., T. Markow, and G. S. Spicer. 1999. Evolution of multiple kinds of female sperm-storage organs  
880 in *Drosophila*. Evolution. 53:1804–1822.
- 881 Price, C. S. C., C. H. Kim, C. J. Gronlund, and J. A. Coyne. 2001. Cryptic reproductive isolation in the  
882 *Drosophila simulans* species complex. Evolution. 55:81–92.
- 883 R Core Team 2017. R: A Language and Environment for Statistical Computing. <https://www.R-project.org/>
- 884 Ritchie, M. G., R. M. Townhill, and A. Hoikkala. 1998. Female preference for fly song: Playback  
885 experiments confirm the targets of sexual selection. Anim. Behav. 56:713–717.
- 886 Rolan-Alvarez, E., and A. Caballero. 2000. Estimating sexual selection and sexual isolation effects from

- 887 mating frequencies. *Evolution*. 54:30–36.
- 888 Rundle, H. D., and D. Schluter. 1998. Reinforcement of stickleback mate preferences: Sympatry breeds  
889 contempt. *Evolution*. 52:200–208.
- 890 Saarikettu, M., J. O. Liimatainen, and A. Hoikkala. 2005. The role of male courtship song in species  
891 recognition in *Drosophila montana*. *Behav. Genet.* 35:257–263.
- 892 Saetre, G. P., M. Král, and S. Bureš. 1997. Differential species recognition abilities of males and females in a  
893 flycatcher hybrid zone. *J. Avian Biol.* 28:259–263.
- 894 Sagga, N., and A. Civetta. 2011. Male-female interactions and the evolution of postmating prezygotic  
895 reproductive isolation among species of the *Virilis* subgroup. *Int. J. Evol. Biol.* 1–11.
- 896 Salminen, T. S., and A. Hoikkala. 2013. Effect of temperature on the duration of sensitive period and on the  
897 number of photoperiodic cycles required for the induction of reproductive diapause in *Drosophila*  
898 *montana*. *J. Insect Physiol.* 59:450–457.
- 899 Schluter, D. 2009. Evidence for ecological speciation and its alternative. *Science*. 323:737–741.
- 900 Seehausen, O. 2004. Hybridization and adaptive radiation. *Trends Ecol. Evol.* 19:198–207.
- 901 Servedio, M. R. 2001. Beyond reinforcement: The evolution of premating isolation by direct selection on  
902 preferences and postmating, prezygotic incompatibilities. *Evolution*. 55:1909–1920.
- 903 Servedio, M. R. 2009. The role of linkage disequilibrium in the evolution of premating isolation. *Heredity*.  
904 102:51–56.
- 905 Servedio, M. R., and M. A. F. Noor. 2003. The role of reinforcement in speciation: Theory and data. *Annu.*  
906 *Rev. Ecol. Evol. Syst.* 34:339–364.
- 907 Simon, C., F. Frati, A. Beckenbach, B. Crespi, H. Lu, and P. Flook. 1994. Evolution, weighting, and  
908 phylogenetic utility of mitochondrial gene sequences and a compilation of conserved polymerase chain  
909 reaction primers. *Ann. Entomol. Soc. Am.* 87:651–701.
- 910 Skaug H., D. Fournier, A. Nielsen, A. Magnusson, B. Bolker. 2013. Generalized linear mixed models using  
911 AD model builder. R package version 0.7.
- 912 Smadja, C. M., and R. K. Butlin. 2011. A framework for comparing processes of speciation in the presence  
913 of gene flow. *Mol. Ecol.* 20:5123–5140.
- 914 Snook, R. R., and T. L. Karr. 1998. Only long sperm are fertilization-competent in six sperm-heteromorphic  
915 *Drosophila* species. *Curr. Biol.* 8:291–294.
- 916 Sobel, J. M., and G. F. Chen. 2014. Unification of methods for estimating the strength of reproductive

- 917 isolation. *Evolution*. 68:1511–1522.
- 918 Stone, W. S., W. C. Guest, and F. D. Wilson. 1960. The evolutionary implications of the cytological  
919 polymorphism and phylogeny of the virilis group of *Drosophila*. *Proc. Natl. Acad. Sci.* 46:350–361.
- 920 Sweigart, A. L. 2010. The genetics of postmating, prezygotic reproductive isolation between *Drosophila*  
921 *virilis* and *D. americana*. *Genetics* 184:401–410.
- 922 Tauber, E., and D. F. Eberl. 2003. Acoustic communication in *Drosophila*. *Behav. Processes* 64:197–210.
- 923 The Marie Curie speciation network. 2012. What do we need to know about speciation? *Trends Ecol. Evol.*  
924 27:27–39.
- 925 Throckmorton, L. H. 1982. The virilis species group. *The Genetics and Biology of Drosophila*. London  
926 Academy Press. 3:227–296.
- 927 Turissini, D. A., G. Liu, J. R. David, and D. R. Matute. 2015. The evolution of reproductive isolation in the  
928 *Drosophila yakuba* complex of species. *J. Evol. Biol.* 28:557–75.
- 929 Turissini, D. A., J. A. McGirr, S. S. Patel, J. R. David, and D. R. Matute. 2018. The rate of evolution of  
930 postmating-prezygotic reproductive isolation in *Drosophila*. *Mol. Biol. Evol.* 35:312–334.
- 931 Wheeler, M. R. 1947. The insemination reaction in intraspecific matings of *Drosophila*. *University Texas*  
932 *Publ.* 4720:78–115.
- 933 Whitney, K. D., R. A. Randell, and L. H. Rieseberg. 2006. Adaptive introgression of herbivore resistance  
934 traits in the weedy sunflower *Helianthus annuus*. *Am. Nat.* 167:794–807.
- 935 Wirtz, P. 1999. Mother species-father species: Unidirectional hybridization in animals with female choice.  
936 *Anim. Behav.* 58:1–12.
- 937 Wu, C. I., H. Hollocher, D. J. Begun, C. F. Aquadro, Y. Xu, and M. L. Wu. 1995. Sexual isolation in  
938 *Drosophila melanogaster*: a possible case of incipient speciation. *Proc. Natl. Acad. Sci. U. S. A.*  
939 92:2519–2523.
- 940 Yukilevich, R. 2012. Asymmetrical patterns of speciation uniquely support reinforcement in *Drosophila*.  
941 *Evolution*. 66:1430–1446.

942 *Appendix*

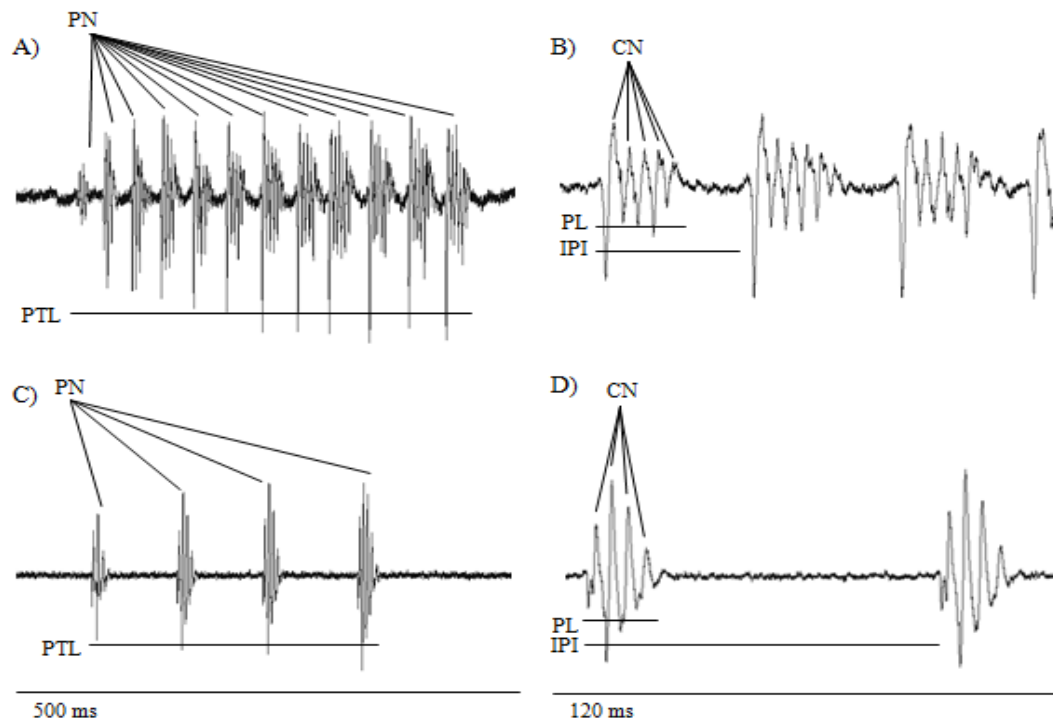

944 Figure A1. Oscillograms of the courtship songs of *D. montana* (A, B) and *D. flavomontana* (C, D) males and  
945 the traits measured from them. PN = number of pulses in a pulse train, PTL = length of a pulse train, CN =  
946 number of cycles in a sound pulse, PL = length of a sound pulse, IPI = interpulse interval.

947

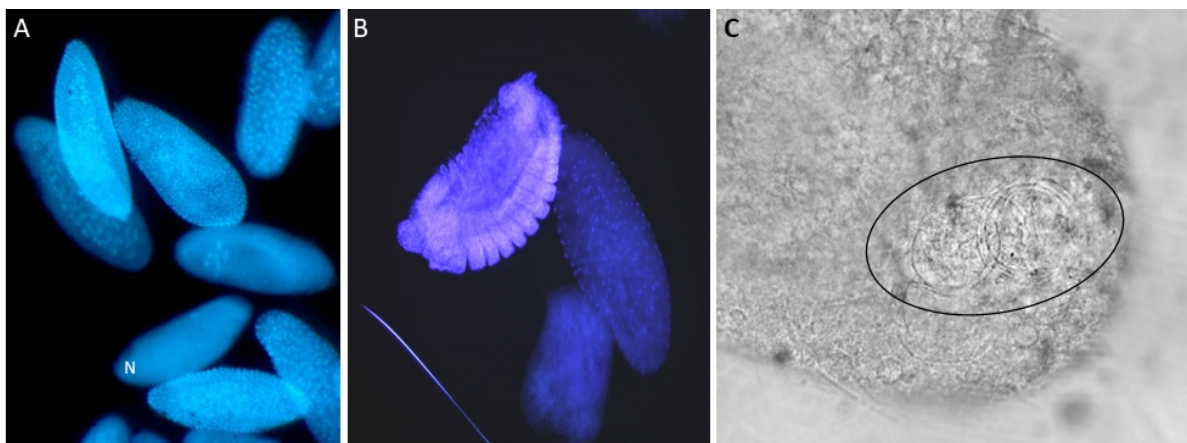

949 Figure A2. (A) Developing eggs with either clear mitotic division or (B) with cellular differentiation. Non-  
950 developing eggs had fewer than four nuclei visible within the egg (marked with N) (C) Sperm is visible as a  
951 spiral structure near the anterior end of the egg.
